# Supplementary material
Source: PubMed Central journal article supplement (PMC8054016)
Supplement: pnas.2015094118.sapp.pdf [file pnas.2015094118.sapp.pdf]

## Supplementary Information for

Global warming is causing a more pronounced dip in marine species richness around the equator

Chhaya Chaudhary<sup>1,2</sup>, Anthony J. Richardson<sup>3,4</sup>, David S. Schoeman<sup>5,6</sup>, Mark J. Costello<sup>7</sup>

Institute of Marine Science, The University of Auckland, 23 Symonds Street, Auckland 1142, New Zealand<sup>1</sup>.

School of Biological Sciences, The University of Hong Kong, Pokfulam, Hong Kong 999077<sup>2</sup>.

School of Mathematics and Physics, The University of Queensland, St Lucia, 4072, Queensland, Australia<sup>3</sup>

CSIRO Oceans and Atmosphere, Queensland Biosciences Precinct, St Lucia 4072, Queensland, Australia<sup>4</sup>

Global-Change Ecology Research Group, School of Science, Technology and Engineering, University of the Sunshine Coast, Maroochydore, QLD 4556, Australia<sup>5</sup>.

Centre for African Conservation Ecology, Department of Zoology, Nelson Mandela University, Port Elizabeth 6031, South Africa<sup>6</sup>.

The School of Environment, The University of Auckland, 23 Symonds Street, Auckland 1142, New Zealand, and Faculty of Biosciences and Aquaculture, Nord University, Bodø 8049, Norway<sup>7</sup>

Chhaya Chaudhary\*

**Email:** [ccha961@aucklanduni.ac.nz](mailto:ccha961@aucklanduni.ac.nz); [chhayachaudhary44@gmail.com](mailto:chhayachaudhary44@gmail.com)

### This PDF file includes:

Figures S1 to S6  
Tables S1 to S7  
SI References

## Figures

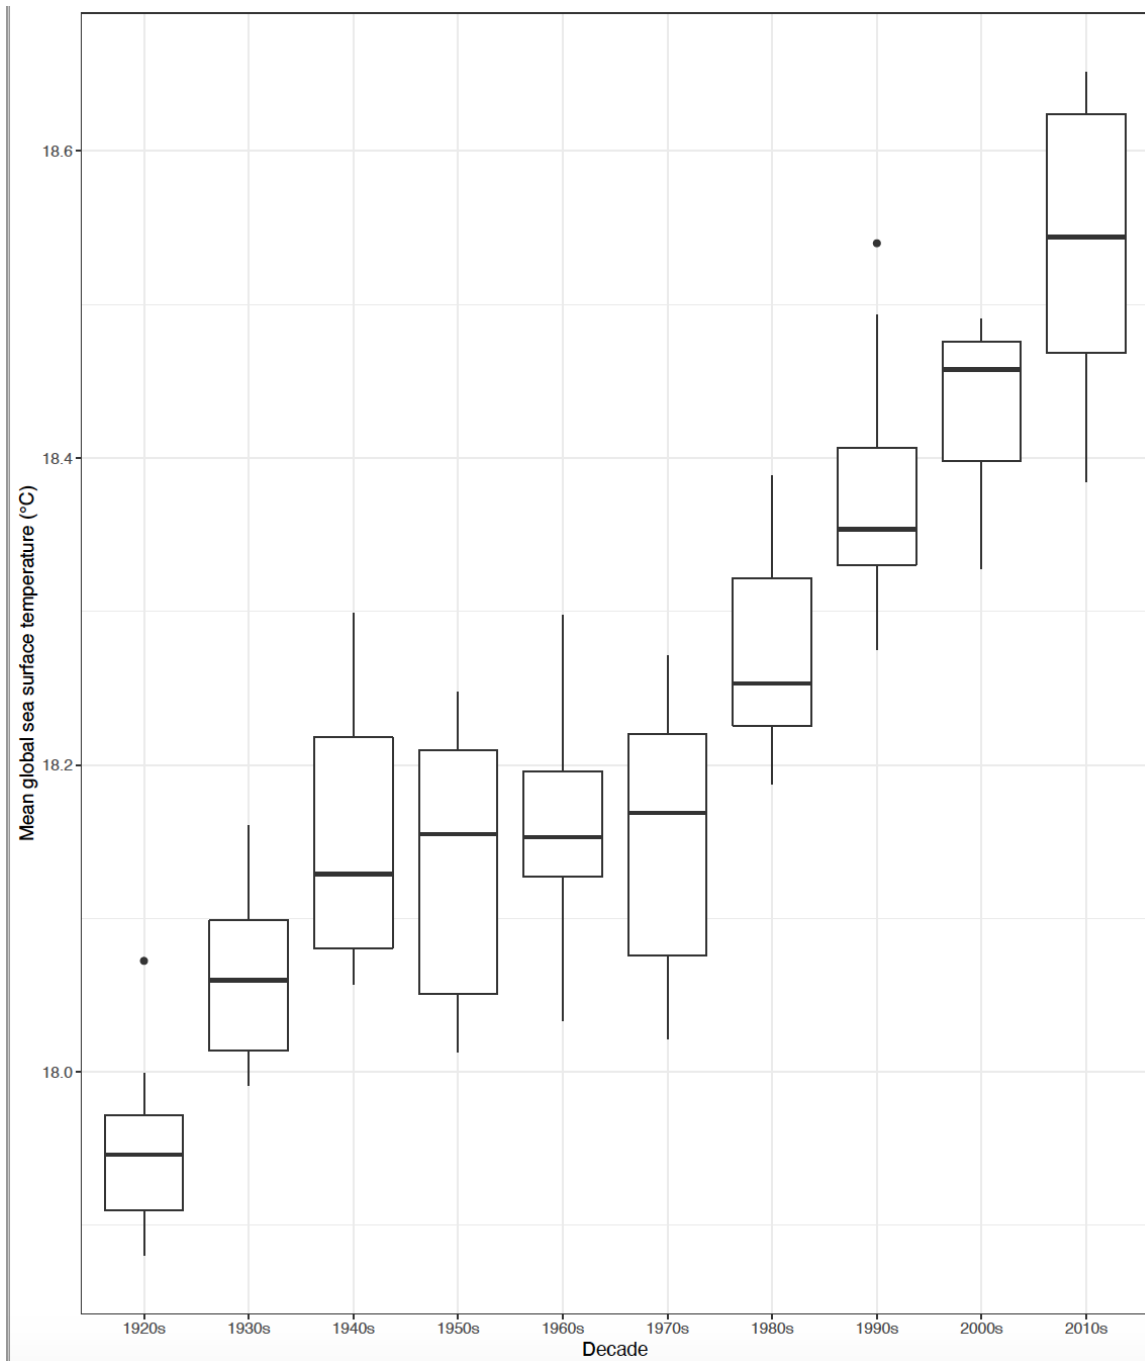

**Fig. S1.** Time series plot of SST (°C) averaged across 5° latitudinal bands in each decade (n=34). The 25<sup>th</sup> and 75<sup>th</sup> percentiles are indicated by the lower and upper boundaries of the boxes, respectively. The black line inside the boxes represents the medians. The points outside the boxes are outliers.

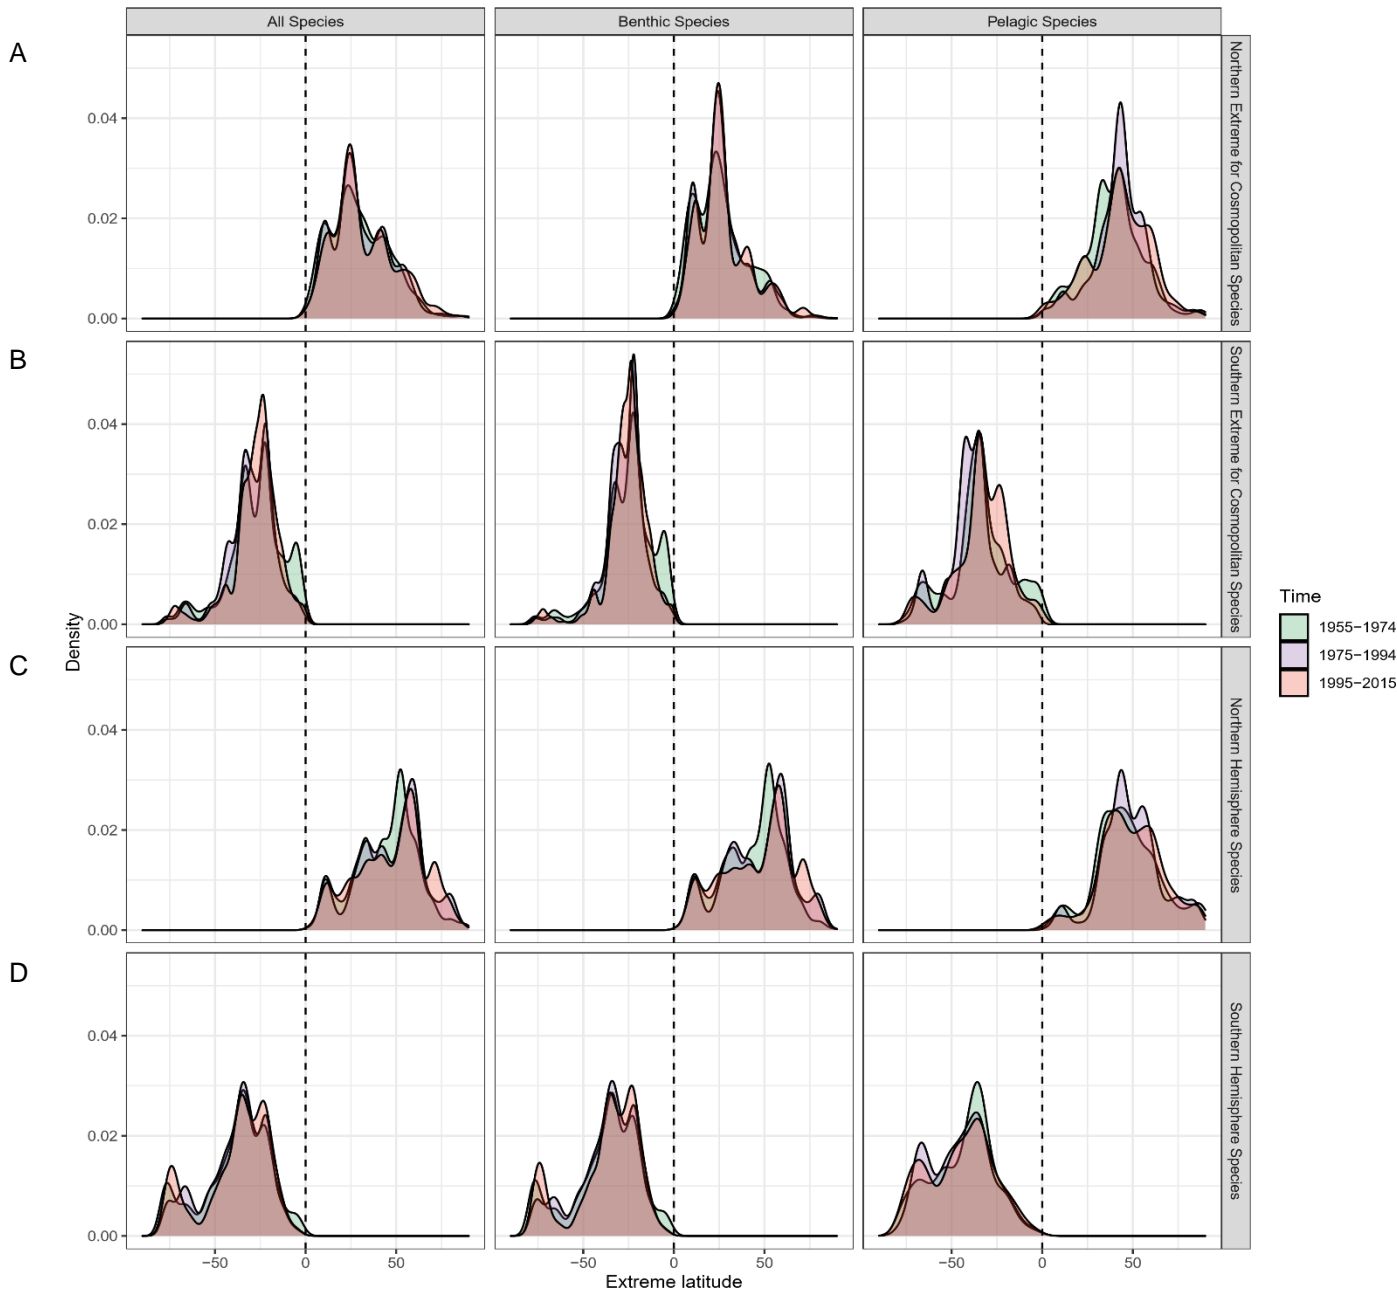

**Fig. S2.** Comparison of density plots of the extreme latitudes of observation records in three time periods (1955—1974, 1975—1994, 1995—2015) of cosmopolitan species found in both the hemispheres, with (A) their extreme northern latitude and (B) their extreme southern latitude illustrated, and species found predominantly in the (C) northern hemisphere and (D) southern hemisphere. Species were classified as northern and southern, when  $\geq 75\%$  of observations fell in one hemisphere or the other; the remaining species were classified as cosmopolitan. Note: this comparison was based on species common to all three time periods.

A 1955 to 1974

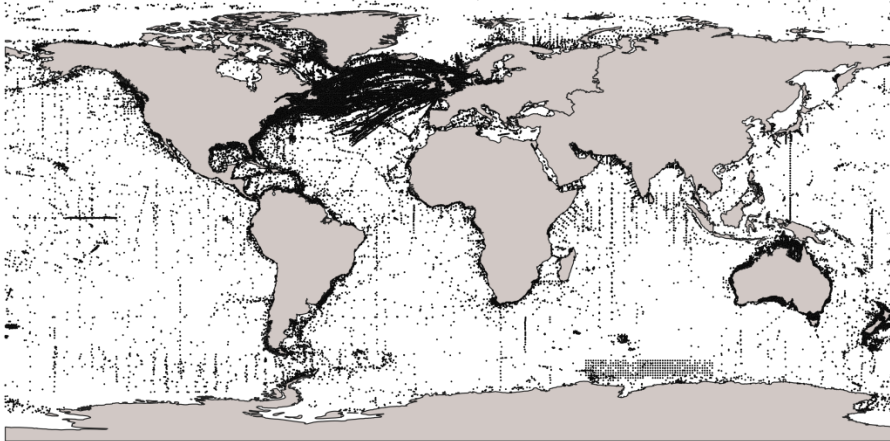

B 1975 to 1994

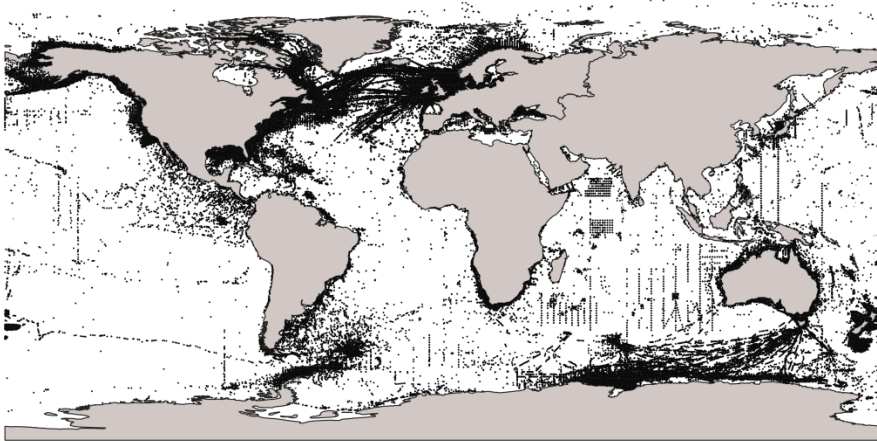

C 1995—2015

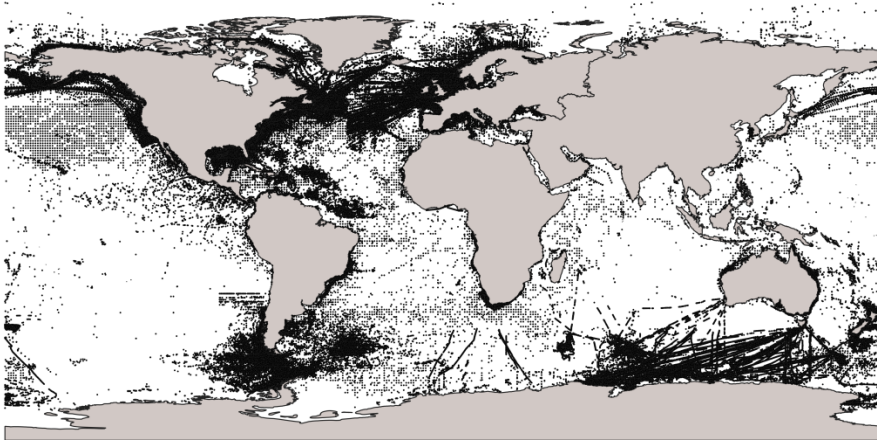

**Fig.S3.** Sampling coverage (black dots) in the time period: (A) 1955—1974, (B) 1975—1994 and (C) 1995—2015.

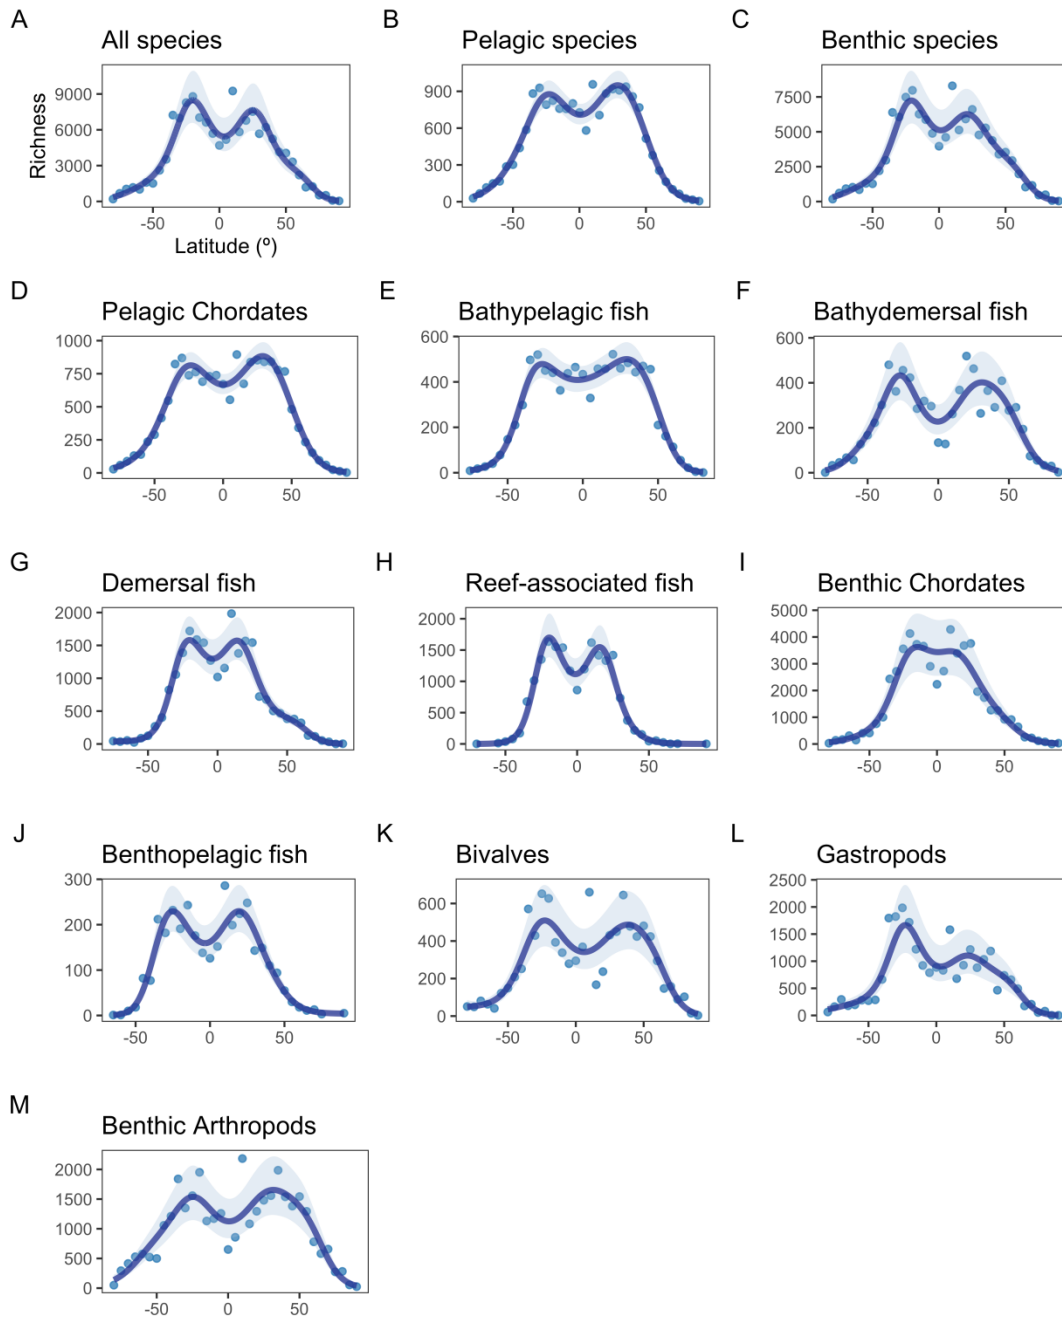

**Fig. S4.** The latitudinal distribution of species richness in marine taxa at the scale of 5° latitudinal bands based on the GAMs (the effect of Latitude adjusting for shelf area), where the degree of smoothness for each parameter was estimated using generalised cross validation, for (A) All species; (B) Pelagic species; (C) Benthic species; (D-E) organisms in the pelagic environment; and (F-M) organisms living near, on or in the seabed. The shaded region in each graph shows the  $\pm 95\%$  confidence envelope for the fit.

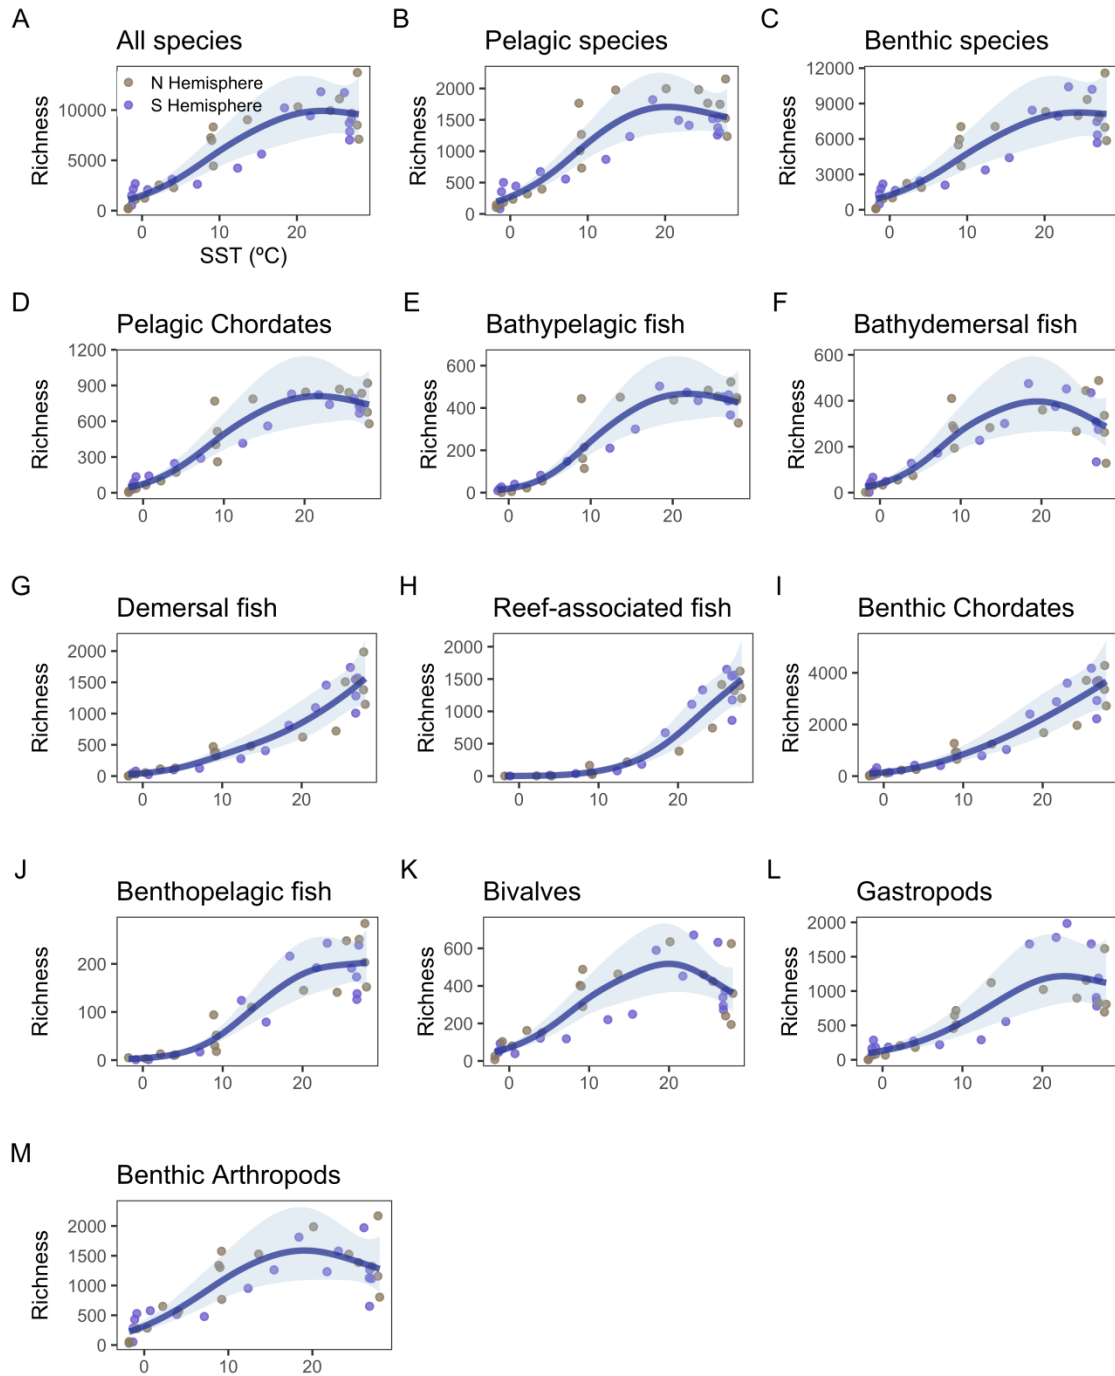

**Fig. S5.** The relationship between species richness and sea surface temperature (SST) based on the GAMs, where the degree of smoothness for each parameter was estimated using generalised cross validation, for (A) All species; (B) Pelagic species; (C) Benthic species; (D-E) organisms in the pelagic environment; and (F-M) seabed associated organisms. The shaded region in each graph shows the  $\pm 95\%$  confidence envelope for the fit.

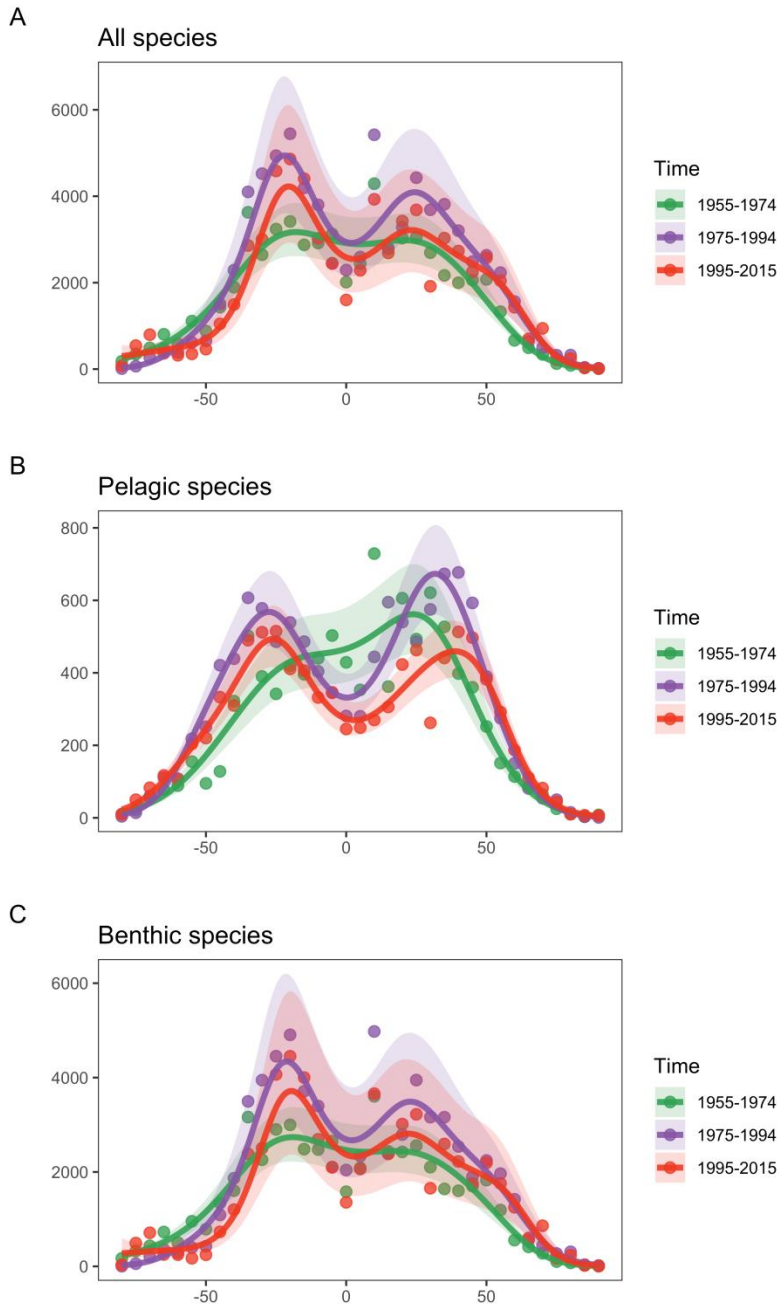

**Fig. S6.** Latitudinal distribution in species richness using GAMs (the effect of Latitude adjusting for shelf area in each 5° latitudinal band), where the degree of smoothness for each parameter was estimated using generalised cross validation, for (A) All species, (B) Pelagic, and (C) Benthic species in three time periods: 1955—1974 (green), 1975—1994 (purple), and 1995—2015 (red). Shaded regions represent  $\pm 95\%$  confidence envelopes for models fit to each of the periods, with shades (from green to red) reflecting progression of time periods from older to more recent.

**Table S1.** Examples of explanations given for the latitudinal gradients in marine species richness in the literature, listed chronologically.

| Study                      | Taxa (species)                                                                                                                            | Region                                                                    | Explanation                                                                     |
|----------------------------|-------------------------------------------------------------------------------------------------------------------------------------------|---------------------------------------------------------------------------|---------------------------------------------------------------------------------|
| Rex et al. (1)             | Deep-sea benthos (97 epibenthic sled samples)                                                                                             | Atlantic                                                                  | Seasonal sinking of organic matter (availability of food)                       |
| Bolton (2)                 | Seaweeds (> 1,700)                                                                                                                        | Global                                                                    | Climate and historical events                                                   |
| Flessa and Jablonski (3)   | Bivalves (600 genera)                                                                                                                     | Global                                                                    | Mass extinction                                                                 |
| Roy et al (4)              | Marine prosobranch gastropods (3,916)                                                                                                     | Western Atlantic and eastern Pacific Ocean from the tropics to the Arctic | Sea surface temperature (SST)                                                   |
| Rutherford et al. (5)      | Planktonic foraminifers (33)                                                                                                              | Global                                                                    | Temperature variation with depth                                                |
| Roy et al. (6)             | Bivalves (930)                                                                                                                            | North-eastern Pacific marine shelf                                        | SST                                                                             |
| Crame (7)                  | Marine bivalves (29)                                                                                                                      | Global (shallow water)                                                    | Productivity                                                                    |
| Rex et al. (8)             | Deep-sea benthos (isopods, gastropods, and bivalves) (93)                                                                                 | North Atlantic                                                            | Seasonal sinking of organic matter (availability of food)                       |
| Culver and Buzas (9)       | Benthic foraminifera (< 25)                                                                                                               | Atlantic Ocean (Norwegian Sea to the Weddell Sea)                         | Ecological and historical factors related to food supply                        |
| Willig (10)                | Crustaceans, molluscs, corals, brachiopods, foraminifers, vascular plants, mammals, birds, reptiles, amphibians, fish, tunicates (review) | The coastal areas of North and South America                              | Geographic area, evolutionary speed, Rapoport effect, and geographic constraint |
| Macpherson (11)            | Fish and invertebrates (6,643)                                                                                                            | Atlantic Ocean                                                            | SST (best predictor for benthic taxa) and nitrate concentration (pelagic taxa)  |
| Woodd-Walker et al. (12)   | Copepod diversity (47 genera)                                                                                                             | Atlantic Ocean                                                            | Temporal patterns of primary and secondary production                           |
| Connolly et al. (13)       | Reef corals (727) and associated reef fish (1,766)                                                                                        | IWP                                                                       | Geographic constraints, environmental variables, speciation, and extinction     |
| Mora et al. (14)           | Reef fish (1,970)                                                                                                                         | Indian and Pacific oceans                                                 | Dispersal                                                                       |
| Valdovinos et al. (15)     | Marine molluscs (629)                                                                                                                     | Pacific South American shelf                                              | Shelf area                                                                      |
| Gage et al. (16)           | Cumacea (225)                                                                                                                             | Atlantic                                                                  | Biogeography                                                                    |
| Witman et al. (17)         | Marine benthic communities (> 3,000)                                                                                                      | Global                                                                    | Colonisation                                                                    |
| Gratwicke and Speight (18) | Caribbean fish (530)                                                                                                                      | South shore of Tortola                                                    | Habitat complexity                                                              |
| Rex et al. (19)            | Benthic molluscs (189)                                                                                                                    | Global                                                                    | Nutrient input                                                                  |
| Worm et al. (20)           | Tuna and bill fish (145)                                                                                                                  | Global                                                                    | Thermoregulation, dissolved oxygen, and temperature                             |
| Brayard et al. (21)        | Foraminifers (33)                                                                                                                         | Atlantic Ocean                                                            | SST and sea surface current                                                     |
| Dolan et al. (22)          | Tintinnids (30)                                                                                                                           | Global                                                                    | Food resources                                                                  |
| Kerswell (23)              | Benthic marine micro algae and Bryopsidales (191)                                                                                         | Global                                                                    | Competition among corals and variation in speciation and extinction             |
| Fuhrman et al. (24)        | Planktonic marine bacteria (103 samples, 1,129 genotypes)                                                                                 | Global (57 locations, coastal and deep sea)                               | SST                                                                             |
| Rombouts et al. (25)       | Marine copepod diversity (~70)                                                                                                            | Global                                                                    | Ocean temperature, salinity,                                                    |



|                       |                                                                                                                                 |        |                                                                                                       |
|-----------------------|---------------------------------------------------------------------------------------------------------------------------------|--------|-------------------------------------------------------------------------------------------------------|
| Tittensor et al. (26) | Fish and sharks (coastal and oceanic), cephalopods, corals, pinnipeds, euphausiids, foraminifers, cetaceans, mangroves (11,567) | Global | and energy (Chlorophyll a) SST                                                                        |
| Kaschner et al. (27)  | Marine mammals (115)                                                                                                            | Global | Global warming (temperature)                                                                          |
| Beaugrand et al. (28) | Foraminifers and copepods (~70)                                                                                                 | Global | Thermal tolerance and fluctuation in temperature and season, Mid Domain Effect (MDE), and niche space |
| Saeedi et al. (29)    | Solenidae (~60)                                                                                                                 | Global | SST                                                                                                   |

**Table S2.** Information on the full GAM models for Figure 1.

| Group           | Model summary                                                                                                                                                                                                                                                                                                                                                                                                                                                                                                                                                                                                                                                                                                                                                                                                                                                                                                                                                                                                                                                                                             | Plots      |          |            |         |          |             |           |           |        |            |           |           |           |       |          |  |     |        |        |         |             |   |   |     |            |                                                                                      |                                                                                      |
|-----------------|-----------------------------------------------------------------------------------------------------------------------------------------------------------------------------------------------------------------------------------------------------------------------------------------------------------------------------------------------------------------------------------------------------------------------------------------------------------------------------------------------------------------------------------------------------------------------------------------------------------------------------------------------------------------------------------------------------------------------------------------------------------------------------------------------------------------------------------------------------------------------------------------------------------------------------------------------------------------------------------------------------------------------------------------------------------------------------------------------------------|------------|----------|------------|---------|----------|-------------|-----------|-----------|--------|------------|-----------|-----------|-----------|-------|----------|--|-----|--------|--------|---------|-------------|---|---|-----|------------|--------------------------------------------------------------------------------------|--------------------------------------------------------------------------------------|
| All             | <p>Family: Negative Binomial(17.38)<br/>Link function: log</p> <p>Formula:<br/>Richness ~ s(Latitude, k = 9, fx = T) + ShelfArea</p> <p>Parametric coefficients:</p> <table border="1"> <thead> <tr> <th></th> <th>Estimate</th> <th>Std. Error</th> <th>z value</th> <th>Pr(&gt; z )</th> </tr> </thead> <tbody> <tr> <td>(Intercept)</td> <td>8.083e+00</td> <td>1.293e-01</td> <td>62.488</td> <td>&lt;2e-16 ***</td> </tr> <tr> <td>ShelfArea</td> <td>3.058e-07</td> <td>1.338e-07</td> <td>2.284</td> <td>0.0223 *</td> </tr> </tbody> </table> <p>---<br/>Signif. codes: 0 '***' 0.001 '**' 0.01 '*' 0.05 '.' 0.1 ' ' 1</p> <p>Approximate significance of smooth terms:</p> <table border="1"> <thead> <tr> <th></th> <th>edf</th> <th>Ref.df</th> <th>Chi.sq</th> <th>p-value</th> </tr> </thead> <tbody> <tr> <td>s(Latitude)</td> <td>8</td> <td>8</td> <td>639</td> <td>&lt;2e-16 ***</td> </tr> </tbody> </table> <p>---<br/>Signif. codes: 0 '***' 0.001 '**' 0.01 '*' 0.05 '.' 0.1 ' ' 1</p> <p>R-sq.(adj) = 0.847 Deviance explained = 94.4%<br/>-REML = 308.79 Scale est. = 1 n = 35</p> |            | Estimate | Std. Error | z value | Pr(> z ) | (Intercept) | 8.083e+00 | 1.293e-01 | 62.488 | <2e-16 *** | ShelfArea | 3.058e-07 | 1.338e-07 | 2.284 | 0.0223 * |  | edf | Ref.df | Chi.sq | p-value | s(Latitude) | 8 | 8 | 639 | <2e-16 *** | 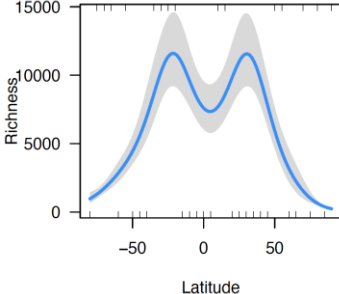  |   |
|                 | Estimate                                                                                                                                                                                                                                                                                                                                                                                                                                                                                                                                                                                                                                                                                                                                                                                                                                                                                                                                                                                                                                                                                                  | Std. Error | z value  | Pr(> z )   |         |          |             |           |           |        |            |           |           |           |       |          |  |     |        |        |         |             |   |   |     |            |                                                                                      |                                                                                      |
| (Intercept)     | 8.083e+00                                                                                                                                                                                                                                                                                                                                                                                                                                                                                                                                                                                                                                                                                                                                                                                                                                                                                                                                                                                                                                                                                                 | 1.293e-01  | 62.488   | <2e-16 *** |         |          |             |           |           |        |            |           |           |           |       |          |  |     |        |        |         |             |   |   |     |            |                                                                                      |                                                                                      |
| ShelfArea       | 3.058e-07                                                                                                                                                                                                                                                                                                                                                                                                                                                                                                                                                                                                                                                                                                                                                                                                                                                                                                                                                                                                                                                                                                 | 1.338e-07  | 2.284    | 0.0223 *   |         |          |             |           |           |        |            |           |           |           |       |          |  |     |        |        |         |             |   |   |     |            |                                                                                      |                                                                                      |
|                 | edf                                                                                                                                                                                                                                                                                                                                                                                                                                                                                                                                                                                                                                                                                                                                                                                                                                                                                                                                                                                                                                                                                                       | Ref.df     | Chi.sq   | p-value    |         |          |             |           |           |        |            |           |           |           |       |          |  |     |        |        |         |             |   |   |     |            |                                                                                      |                                                                                      |
| s(Latitude)     | 8                                                                                                                                                                                                                                                                                                                                                                                                                                                                                                                                                                                                                                                                                                                                                                                                                                                                                                                                                                                                                                                                                                         | 8          | 639      | <2e-16 *** |         |          |             |           |           |        |            |           |           |           |       |          |  |     |        |        |         |             |   |   |     |            |                                                                                      |                                                                                      |
| Pelagic species | <p>Family: Negative Binomial(30.955)<br/>Link function: log</p> <p>Formula:<br/>Richness ~ s(Latitude, k = 9, fx = T) + ShelfArea</p> <p>Parametric coefficients:</p> <table border="1"> <thead> <tr> <th></th> <th>Estimate</th> <th>Std. Error</th> <th>z value</th> <th>Pr(&gt; z )</th> </tr> </thead> <tbody> <tr> <td>(Intercept)</td> <td>6.517e+00</td> <td>1.012e-01</td> <td>64.411</td> <td>&lt;2e-16 ***</td> </tr> <tr> <td>ShelfArea</td> <td>1.546e-07</td> <td>1.047e-07</td> <td>1.477</td> <td>0.14</td> </tr> </tbody> </table> <p>---<br/>Signif. codes: 0 '***' 0.001 '**' 0.01 '*' 0.05 '.' 0.1 ' ' 1</p> <p>Approximate significance of smooth terms:</p> <table border="1"> <thead> <tr> <th></th> <th>edf</th> <th>Ref.df</th> <th>Chi.sq</th> <th>p-value</th> </tr> </thead> <tbody> <tr> <td>s(Latitude)</td> <td>8</td> <td>8</td> <td>801</td> <td>&lt;2e-16 ***</td> </tr> </tbody> </table> <p>---<br/>Signif. codes: 0 '***' 0.001 '**' 0.01 '*' 0.05 '.' 0.1 ' ' 1</p> <p>R-sq.(adj) = 0.905 Deviance explained = 96.1%<br/>-REML = 242.8 Scale est. = 1 n = 35</p>     |            | Estimate | Std. Error | z value | Pr(> z ) | (Intercept) | 6.517e+00 | 1.012e-01 | 64.411 | <2e-16 *** | ShelfArea | 1.546e-07 | 1.047e-07 | 1.477 | 0.14     |  | edf | Ref.df | Chi.sq | p-value | s(Latitude) | 8 | 8 | 801 | <2e-16 *** |  |  |
|                 | Estimate                                                                                                                                                                                                                                                                                                                                                                                                                                                                                                                                                                                                                                                                                                                                                                                                                                                                                                                                                                                                                                                                                                  | Std. Error | z value  | Pr(> z )   |         |          |             |           |           |        |            |           |           |           |       |          |  |     |        |        |         |             |   |   |     |            |                                                                                      |                                                                                      |
| (Intercept)     | 6.517e+00                                                                                                                                                                                                                                                                                                                                                                                                                                                                                                                                                                                                                                                                                                                                                                                                                                                                                                                                                                                                                                                                                                 | 1.012e-01  | 64.411   | <2e-16 *** |         |          |             |           |           |        |            |           |           |           |       |          |  |     |        |        |         |             |   |   |     |            |                                                                                      |                                                                                      |
| ShelfArea       | 1.546e-07                                                                                                                                                                                                                                                                                                                                                                                                                                                                                                                                                                                                                                                                                                                                                                                                                                                                                                                                                                                                                                                                                                 | 1.047e-07  | 1.477    | 0.14       |         |          |             |           |           |        |            |           |           |           |       |          |  |     |        |        |         |             |   |   |     |            |                                                                                      |                                                                                      |
|                 | edf                                                                                                                                                                                                                                                                                                                                                                                                                                                                                                                                                                                                                                                                                                                                                                                                                                                                                                                                                                                                                                                                                                       | Ref.df     | Chi.sq   | p-value    |         |          |             |           |           |        |            |           |           |           |       |          |  |     |        |        |         |             |   |   |     |            |                                                                                      |                                                                                      |
| s(Latitude)     | 8                                                                                                                                                                                                                                                                                                                                                                                                                                                                                                                                                                                                                                                                                                                                                                                                                                                                                                                                                                                                                                                                                                         | 8          | 801      | <2e-16 *** |         |          |             |           |           |        |            |           |           |           |       |          |  |     |        |        |         |             |   |   |     |            |                                                                                      |                                                                                      |

| <p><b>Benthic species</b></p>   | <p>Family: Negative Binomial(13.164)<br/>Link function: log</p> <p>Formula:<br/>Richness ~ s(Latitude, k = 9, fx = T) + ShelfArea</p> <p>Parametric coefficients:</p> <table border="1"> <thead> <tr> <th></th> <th>Estimate</th> <th>Std. Error</th> <th>z value</th> <th>Pr(&gt; z )</th> </tr> </thead> <tbody> <tr> <td>(Intercept)</td> <td>7.812e+00</td> <td>1.488e-01</td> <td>52.51</td> <td>&lt;2e-16 ***</td> </tr> <tr> <td>ShelfArea</td> <td>3.633e-07</td> <td>1.539e-07</td> <td>2.36</td> <td>0.0183 *</td> </tr> </tbody> </table> <p>---<br/>Signif. codes: 0 '***' 0.001 '**' 0.01 '*' 0.05 '.' 0.1 ' ' 1</p> <p>Approximate significance of smooth terms:</p> <table border="1"> <thead> <tr> <th></th> <th>edf</th> <th>Ref.df</th> <th>Chi.sq</th> <th>p-value</th> </tr> </thead> <tbody> <tr> <td>s(Latitude)</td> <td>8</td> <td>8</td> <td>548.5</td> <td>&lt;2e-16 ***</td> </tr> </tbody> </table> <p>---<br/>Signif. codes: 0 '***' 0.001 '**' 0.01 '*' 0.05 '.' 0.1 ' ' 1</p> <p>R-sq.(adj) = 0.831 Deviance explained = 93.2%<br/>-REML = 304.54 Scale est. = 1 n = 35</p> |            | Estimate | Std. Error | z value | Pr(> z ) | (Intercept) | 7.812e+00 | 1.488e-01 | 52.51 | <2e-16 *** | ShelfArea | 3.633e-07 | 1.539e-07 | 2.36 | 0.0183 * |  | edf | Ref.df | Chi.sq | p-value | s(Latitude) | 8 | 8 | 548.5 | <2e-16 *** | 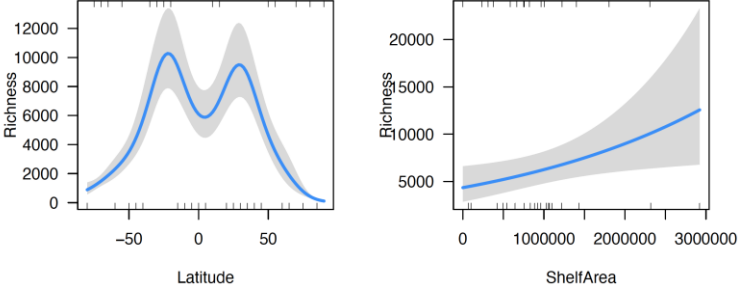  |
|---------------------------------|------------------------------------------------------------------------------------------------------------------------------------------------------------------------------------------------------------------------------------------------------------------------------------------------------------------------------------------------------------------------------------------------------------------------------------------------------------------------------------------------------------------------------------------------------------------------------------------------------------------------------------------------------------------------------------------------------------------------------------------------------------------------------------------------------------------------------------------------------------------------------------------------------------------------------------------------------------------------------------------------------------------------------------------------------------------------------------------------------------|------------|----------|------------|---------|----------|-------------|-----------|-----------|-------|------------|-----------|-----------|-----------|------|----------|--|-----|--------|--------|---------|-------------|---|---|-------|------------|--------------------------------------------------------------------------------------|
|                                 | Estimate                                                                                                                                                                                                                                                                                                                                                                                                                                                                                                                                                                                                                                                                                                                                                                                                                                                                                                                                                                                                                                                                                                   | Std. Error | z value  | Pr(> z )   |         |          |             |           |           |       |            |           |           |           |      |          |  |     |        |        |         |             |   |   |       |            |                                                                                      |
| (Intercept)                     | 7.812e+00                                                                                                                                                                                                                                                                                                                                                                                                                                                                                                                                                                                                                                                                                                                                                                                                                                                                                                                                                                                                                                                                                                  | 1.488e-01  | 52.51    | <2e-16 *** |         |          |             |           |           |       |            |           |           |           |      |          |  |     |        |        |         |             |   |   |       |            |                                                                                      |
| ShelfArea                       | 3.633e-07                                                                                                                                                                                                                                                                                                                                                                                                                                                                                                                                                                                                                                                                                                                                                                                                                                                                                                                                                                                                                                                                                                  | 1.539e-07  | 2.36     | 0.0183 *   |         |          |             |           |           |       |            |           |           |           |      |          |  |     |        |        |         |             |   |   |       |            |                                                                                      |
|                                 | edf                                                                                                                                                                                                                                                                                                                                                                                                                                                                                                                                                                                                                                                                                                                                                                                                                                                                                                                                                                                                                                                                                                        | Ref.df     | Chi.sq   | p-value    |         |          |             |           |           |       |            |           |           |           |      |          |  |     |        |        |         |             |   |   |       |            |                                                                                      |
| s(Latitude)                     | 8                                                                                                                                                                                                                                                                                                                                                                                                                                                                                                                                                                                                                                                                                                                                                                                                                                                                                                                                                                                                                                                                                                          | 8          | 548.5    | <2e-16 *** |         |          |             |           |           |       |            |           |           |           |      |          |  |     |        |        |         |             |   |   |       |            |                                                                                      |
| <p><b>Pelagic chordates</b></p> | <p>Family: Negative Binomial(102.859)<br/>Link function: log</p> <p>Formula:<br/>Richness ~ s(Latitude, k = 9, fx = T) + ShelfArea</p> <p>Parametric coefficients:</p> <table border="1"> <thead> <tr> <th></th> <th>Estimate</th> <th>Std. Error</th> <th>z value</th> <th>Pr(&gt; z )</th> </tr> </thead> <tbody> <tr> <td>(Intercept)</td> <td>5.505e+00</td> <td>7.635e-02</td> <td>72.11</td> <td>&lt;2e-16 ***</td> </tr> <tr> <td>ShelfArea</td> <td>1.642e-07</td> <td>7.709e-08</td> <td>2.13</td> <td>0.0332 *</td> </tr> </tbody> </table> <p>---<br/>Signif. codes: 0 '***' 0.001 '**' 0.01 '*' 0.05 '.' 0.1 ' ' 1</p> <p>Approximate significance of smooth terms:</p> <table border="1"> <thead> <tr> <th></th> <th>edf</th> <th>Ref.df</th> <th>Chi.sq</th> <th>p-value</th> </tr> </thead> <tbody> <tr> <td>s(Latitude)</td> <td>8</td> <td>8</td> <td>1817</td> <td>&lt;2e-16 ***</td> </tr> </tbody> </table> <p>---<br/>Signif. codes: 0 '***' 0.001 '**' 0.01 '*' 0.05 '.' 0.1 ' ' 1</p> <p>R-sq.(adj) = 0.963 Deviance explained = 98.9%<br/>-REML = 197.86 Scale est. = 1 n = 35</p> |            | Estimate | Std. Error | z value | Pr(> z ) | (Intercept) | 5.505e+00 | 7.635e-02 | 72.11 | <2e-16 *** | ShelfArea | 1.642e-07 | 7.709e-08 | 2.13 | 0.0332 * |  | edf | Ref.df | Chi.sq | p-value | s(Latitude) | 8 | 8 | 1817  | <2e-16 *** |  |
|                                 | Estimate                                                                                                                                                                                                                                                                                                                                                                                                                                                                                                                                                                                                                                                                                                                                                                                                                                                                                                                                                                                                                                                                                                   | Std. Error | z value  | Pr(> z )   |         |          |             |           |           |       |            |           |           |           |      |          |  |     |        |        |         |             |   |   |       |            |                                                                                      |
| (Intercept)                     | 5.505e+00                                                                                                                                                                                                                                                                                                                                                                                                                                                                                                                                                                                                                                                                                                                                                                                                                                                                                                                                                                                                                                                                                                  | 7.635e-02  | 72.11    | <2e-16 *** |         |          |             |           |           |       |            |           |           |           |      |          |  |     |        |        |         |             |   |   |       |            |                                                                                      |
| ShelfArea                       | 1.642e-07                                                                                                                                                                                                                                                                                                                                                                                                                                                                                                                                                                                                                                                                                                                                                                                                                                                                                                                                                                                                                                                                                                  | 7.709e-08  | 2.13     | 0.0332 *   |         |          |             |           |           |       |            |           |           |           |      |          |  |     |        |        |         |             |   |   |       |            |                                                                                      |
|                                 | edf                                                                                                                                                                                                                                                                                                                                                                                                                                                                                                                                                                                                                                                                                                                                                                                                                                                                                                                                                                                                                                                                                                        | Ref.df     | Chi.sq   | p-value    |         |          |             |           |           |       |            |           |           |           |      |          |  |     |        |        |         |             |   |   |       |            |                                                                                      |
| s(Latitude)                     | 8                                                                                                                                                                                                                                                                                                                                                                                                                                                                                                                                                                                                                                                                                                                                                                                                                                                                                                                                                                                                                                                                                                          | 8          | 1817     | <2e-16 *** |         |          |             |           |           |       |            |           |           |           |      |          |  |     |        |        |         |             |   |   |       |            |                                                                                      |

| <p><b>Bathypelagic fish</b></p>  | <p>Family: Negative Binomial(66.802)<br/>Link function: log</p> <p>Formula:<br/>Richness ~ s(Latitude, k = 9, fx = T) + ShelfArea</p> <p>Parametric coefficients:</p> <table border="1"> <thead> <tr> <th></th> <th>Estimate</th> <th>Std. Error</th> <th>z value</th> <th>Pr(&gt; z )</th> </tr> </thead> <tbody> <tr> <td>(Intercept)</td> <td>4.920e+00</td> <td>1.317e-01</td> <td>37.346</td> <td>&lt;2e-16 ***</td> </tr> <tr> <td>ShelfArea</td> <td>1.154e-07</td> <td>1.253e-07</td> <td>0.921</td> <td>0.357</td> </tr> </tbody> </table> <p>---<br/>Signif. codes: 0 '***' 0.001 '**' 0.01 '*' 0.05 '.' 0.1 ' ' 1</p> <p>Approximate significance of smooth terms:</p> <table border="1"> <thead> <tr> <th></th> <th>edf</th> <th>Ref.df</th> <th>Chi.sq</th> <th>p-value</th> </tr> </thead> <tbody> <tr> <td>s(Latitude)</td> <td>8</td> <td>8</td> <td>995.6</td> <td>&lt;2e-16 ***</td> </tr> </tbody> </table> <p>---<br/>Signif. codes: 0 '***' 0.001 '**' 0.01 '*' 0.05 '.' 0.1 ' ' 1</p> <p>R-sq.(adj) = 0.949    Deviance explained = 98.6%<br/>-REML = 166.97    Scale est. = 1            n = 32</p>       |            | Estimate | Std. Error  | z value | Pr(> z ) | (Intercept) | 4.920e+00 | 1.317e-01 | 37.346 | <2e-16 ***  | ShelfArea | 1.154e-07 | 1.253e-07 | 0.921 | 0.357      |  | edf | Ref.df | Chi.sq | p-value | s(Latitude) | 8 | 8 | 995.6 | <2e-16 *** | 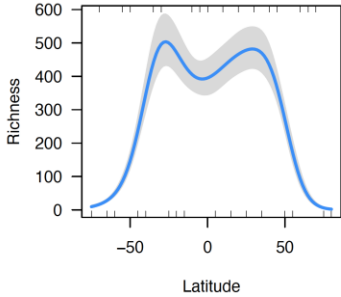  |   |
|----------------------------------|----------------------------------------------------------------------------------------------------------------------------------------------------------------------------------------------------------------------------------------------------------------------------------------------------------------------------------------------------------------------------------------------------------------------------------------------------------------------------------------------------------------------------------------------------------------------------------------------------------------------------------------------------------------------------------------------------------------------------------------------------------------------------------------------------------------------------------------------------------------------------------------------------------------------------------------------------------------------------------------------------------------------------------------------------------------------------------------------------------------------------------|------------|----------|-------------|---------|----------|-------------|-----------|-----------|--------|-------------|-----------|-----------|-----------|-------|------------|--|-----|--------|--------|---------|-------------|---|---|-------|------------|--------------------------------------------------------------------------------------|--------------------------------------------------------------------------------------|
|                                  | Estimate                                                                                                                                                                                                                                                                                                                                                                                                                                                                                                                                                                                                                                                                                                                                                                                                                                                                                                                                                                                                                                                                                                                         | Std. Error | z value  | Pr(> z )    |         |          |             |           |           |        |             |           |           |           |       |            |  |     |        |        |         |             |   |   |       |            |                                                                                      |                                                                                      |
| (Intercept)                      | 4.920e+00                                                                                                                                                                                                                                                                                                                                                                                                                                                                                                                                                                                                                                                                                                                                                                                                                                                                                                                                                                                                                                                                                                                        | 1.317e-01  | 37.346   | <2e-16 ***  |         |          |             |           |           |        |             |           |           |           |       |            |  |     |        |        |         |             |   |   |       |            |                                                                                      |                                                                                      |
| ShelfArea                        | 1.154e-07                                                                                                                                                                                                                                                                                                                                                                                                                                                                                                                                                                                                                                                                                                                                                                                                                                                                                                                                                                                                                                                                                                                        | 1.253e-07  | 0.921    | 0.357       |         |          |             |           |           |        |             |           |           |           |       |            |  |     |        |        |         |             |   |   |       |            |                                                                                      |                                                                                      |
|                                  | edf                                                                                                                                                                                                                                                                                                                                                                                                                                                                                                                                                                                                                                                                                                                                                                                                                                                                                                                                                                                                                                                                                                                              | Ref.df     | Chi.sq   | p-value     |         |          |             |           |           |        |             |           |           |           |       |            |  |     |        |        |         |             |   |   |       |            |                                                                                      |                                                                                      |
| s(Latitude)                      | 8                                                                                                                                                                                                                                                                                                                                                                                                                                                                                                                                                                                                                                                                                                                                                                                                                                                                                                                                                                                                                                                                                                                                | 8          | 995.6    | <2e-16 ***  |         |          |             |           |           |        |             |           |           |           |       |            |  |     |        |        |         |             |   |   |       |            |                                                                                      |                                                                                      |
| <p><b>Bathydemersal fish</b></p> | <p>Family: Negative Binomial(10.303)<br/>Link function: log</p> <p>Formula:<br/>Richness ~ s(Latitude, k = 9, fx = T) + ShelfArea</p> <p>Parametric coefficients:</p> <table border="1"> <thead> <tr> <th></th> <th>Estimate</th> <th>Std. Error</th> <th>z value</th> <th>Pr(&gt; z )</th> </tr> </thead> <tbody> <tr> <td>(Intercept)</td> <td>4.533e+00</td> <td>1.911e-01</td> <td>23.720</td> <td>&lt; 2e-16 ***</td> </tr> <tr> <td>ShelfArea</td> <td>4.945e-07</td> <td>1.881e-07</td> <td>2.629</td> <td>0.00855 **</td> </tr> </tbody> </table> <p>---<br/>Signif. codes: 0 '***' 0.001 '**' 0.01 '*' 0.05 '.' 0.1 ' ' 1</p> <p>Approximate significance of smooth terms:</p> <table border="1"> <thead> <tr> <th></th> <th>edf</th> <th>Ref.df</th> <th>Chi.sq</th> <th>p-value</th> </tr> </thead> <tbody> <tr> <td>s(Latitude)</td> <td>8</td> <td>8</td> <td>294.1</td> <td>&lt;2e-16 ***</td> </tr> </tbody> </table> <p>---<br/>Signif. codes: 0 '***' 0.001 '**' 0.01 '*' 0.05 '.' 0.1 ' ' 1</p> <p>R-sq.(adj) = 0.785    Deviance explained = 89.7%<br/>-REML = 195.22    Scale est. = 1            n = 34</p> |            | Estimate | Std. Error  | z value | Pr(> z ) | (Intercept) | 4.533e+00 | 1.911e-01 | 23.720 | < 2e-16 *** | ShelfArea | 4.945e-07 | 1.881e-07 | 2.629 | 0.00855 ** |  | edf | Ref.df | Chi.sq | p-value | s(Latitude) | 8 | 8 | 294.1 | <2e-16 *** |  |  |
|                                  | Estimate                                                                                                                                                                                                                                                                                                                                                                                                                                                                                                                                                                                                                                                                                                                                                                                                                                                                                                                                                                                                                                                                                                                         | Std. Error | z value  | Pr(> z )    |         |          |             |           |           |        |             |           |           |           |       |            |  |     |        |        |         |             |   |   |       |            |                                                                                      |                                                                                      |
| (Intercept)                      | 4.533e+00                                                                                                                                                                                                                                                                                                                                                                                                                                                                                                                                                                                                                                                                                                                                                                                                                                                                                                                                                                                                                                                                                                                        | 1.911e-01  | 23.720   | < 2e-16 *** |         |          |             |           |           |        |             |           |           |           |       |            |  |     |        |        |         |             |   |   |       |            |                                                                                      |                                                                                      |
| ShelfArea                        | 4.945e-07                                                                                                                                                                                                                                                                                                                                                                                                                                                                                                                                                                                                                                                                                                                                                                                                                                                                                                                                                                                                                                                                                                                        | 1.881e-07  | 2.629    | 0.00855 **  |         |          |             |           |           |        |             |           |           |           |       |            |  |     |        |        |         |             |   |   |       |            |                                                                                      |                                                                                      |
|                                  | edf                                                                                                                                                                                                                                                                                                                                                                                                                                                                                                                                                                                                                                                                                                                                                                                                                                                                                                                                                                                                                                                                                                                              | Ref.df     | Chi.sq   | p-value     |         |          |             |           |           |        |             |           |           |           |       |            |  |     |        |        |         |             |   |   |       |            |                                                                                      |                                                                                      |
| s(Latitude)                      | 8                                                                                                                                                                                                                                                                                                                                                                                                                                                                                                                                                                                                                                                                                                                                                                                                                                                                                                                                                                                                                                                                                                                                | 8          | 294.1    | <2e-16 ***  |         |          |             |           |           |        |             |           |           |           |       |            |  |     |        |        |         |             |   |   |       |            |                                                                                      |                                                                                      |

| <p>Demersal fish</p>        | <p>Family: Negative Binomial(20.49)<br/>Link function: log</p> <p>Formula:<br/>Richness ~ s(Latitude, k = 9, fx = T) + ShelfArea</p> <p>Parametric coefficients:</p> <table border="1"> <thead> <tr> <th></th> <th>Estimate</th> <th>Std. Error</th> <th>z value</th> <th>Pr(&gt; z )</th> </tr> </thead> <tbody> <tr> <td>(Intercept)</td> <td>5.309e+00</td> <td>1.511e-01</td> <td>35.139</td> <td>&lt;2e-16 ***</td> </tr> <tr> <td>ShelfArea</td> <td>3.855e-07</td> <td>1.498e-07</td> <td>2.573</td> <td>0.0101 *</td> </tr> </tbody> </table> <p>---<br/>Signif. codes: 0 '***' 0.001 '**' 0.01 '*' 0.05 '.' 0.1 ' ' 1</p> <p>Approximate significance of smooth terms:</p> <table border="1"> <thead> <tr> <th></th> <th>edf</th> <th>Ref.df</th> <th>Chi.sq</th> <th>p-value</th> </tr> </thead> <tbody> <tr> <td>s(Latitude)</td> <td>8</td> <td>8</td> <td>1039</td> <td>&lt;2e-16 ***</td> </tr> </tbody> </table> <p>---<br/>Signif. codes: 0 '***' 0.001 '**' 0.01 '*' 0.05 '.' 0.1 ' ' 1</p> <p>R-sq.(adj) = 0.932 Deviance explained = 97%<br/>-REML = 212.09 Scale est. = 1 n = 34</p>     |            | Estimate | Std. Error   | z value | Pr(> z ) | (Intercept) | 5.309e+00 | 1.511e-01 | 35.139 | <2e-16 ***  | ShelfArea | 3.855e-07 | 1.498e-07 | 2.573 | 0.0101 *     |  | edf | Ref.df | Chi.sq | p-value | s(Latitude) | 8 | 8 | 1039 | <2e-16 *** | 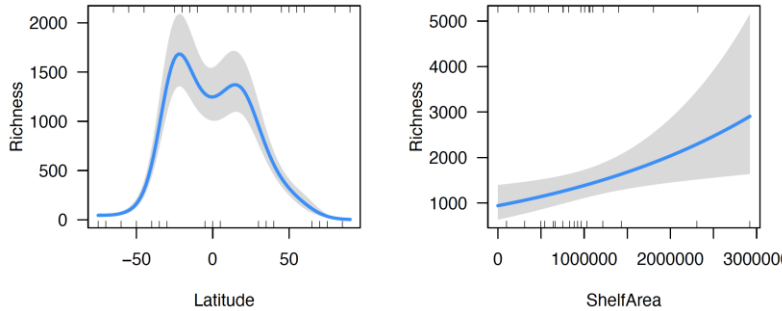 <p>The top-left plot shows Richness (y-axis, 0 to 2000) versus Latitude (x-axis, -50 to 50). The curve is bimodal with peaks around -10 and 10, and a dip near 0. The top-right plot shows Richness (y-axis, 1000 to 5000) versus ShelfArea (x-axis, 0 to 3000000). The curve shows an increasing trend of Richness with ShelfArea.</p>        |
|-----------------------------|--------------------------------------------------------------------------------------------------------------------------------------------------------------------------------------------------------------------------------------------------------------------------------------------------------------------------------------------------------------------------------------------------------------------------------------------------------------------------------------------------------------------------------------------------------------------------------------------------------------------------------------------------------------------------------------------------------------------------------------------------------------------------------------------------------------------------------------------------------------------------------------------------------------------------------------------------------------------------------------------------------------------------------------------------------------------------------------------------------------|------------|----------|--------------|---------|----------|-------------|-----------|-----------|--------|-------------|-----------|-----------|-----------|-------|--------------|--|-----|--------|--------|---------|-------------|---|---|------|------------|------------------------------------------------------------------------------------------------------------------------------------------------------------------------------------------------------------------------------------------------------------------------------------------------------------------------------------------------------------------------------------------------------------------------------------|
|                             | Estimate                                                                                                                                                                                                                                                                                                                                                                                                                                                                                                                                                                                                                                                                                                                                                                                                                                                                                                                                                                                                                                                                                                     | Std. Error | z value  | Pr(> z )     |         |          |             |           |           |        |             |           |           |           |       |              |  |     |        |        |         |             |   |   |      |            |                                                                                                                                                                                                                                                                                                                                                                                                                                    |
| (Intercept)                 | 5.309e+00                                                                                                                                                                                                                                                                                                                                                                                                                                                                                                                                                                                                                                                                                                                                                                                                                                                                                                                                                                                                                                                                                                    | 1.511e-01  | 35.139   | <2e-16 ***   |         |          |             |           |           |        |             |           |           |           |       |              |  |     |        |        |         |             |   |   |      |            |                                                                                                                                                                                                                                                                                                                                                                                                                                    |
| ShelfArea                   | 3.855e-07                                                                                                                                                                                                                                                                                                                                                                                                                                                                                                                                                                                                                                                                                                                                                                                                                                                                                                                                                                                                                                                                                                    | 1.498e-07  | 2.573    | 0.0101 *     |         |          |             |           |           |        |             |           |           |           |       |              |  |     |        |        |         |             |   |   |      |            |                                                                                                                                                                                                                                                                                                                                                                                                                                    |
|                             | edf                                                                                                                                                                                                                                                                                                                                                                                                                                                                                                                                                                                                                                                                                                                                                                                                                                                                                                                                                                                                                                                                                                          | Ref.df     | Chi.sq   | p-value      |         |          |             |           |           |        |             |           |           |           |       |              |  |     |        |        |         |             |   |   |      |            |                                                                                                                                                                                                                                                                                                                                                                                                                                    |
| s(Latitude)                 | 8                                                                                                                                                                                                                                                                                                                                                                                                                                                                                                                                                                                                                                                                                                                                                                                                                                                                                                                                                                                                                                                                                                            | 8          | 1039     | <2e-16 ***   |         |          |             |           |           |        |             |           |           |           |       |              |  |     |        |        |         |             |   |   |      |            |                                                                                                                                                                                                                                                                                                                                                                                                                                    |
| <p>Reef-associated fish</p> | <p>Family: Negative Binomial(44.303)<br/>Link function: log</p> <p>Formula:<br/>Richness ~ s(Latitude, k = 9, fx = T) + ShelfArea</p> <p>Parametric coefficients:</p> <table border="1"> <thead> <tr> <th></th> <th>Estimate</th> <th>Std. Error</th> <th>z value</th> <th>Pr(&gt; z )</th> </tr> </thead> <tbody> <tr> <td>(Intercept)</td> <td>4.533e+00</td> <td>2.040e-01</td> <td>22.225</td> <td>&lt; 2e-16 ***</td> </tr> <tr> <td>ShelfArea</td> <td>7.180e-07</td> <td>2.048e-07</td> <td>3.506</td> <td>0.000454 ***</td> </tr> </tbody> </table> <p>---<br/>Signif. codes: 0 '***' 0.001 '**' 0.01 '*' 0.05 '.' 0.1 ' ' 1</p> <p>Approximate significance of smooth terms:</p> <table border="1"> <thead> <tr> <th></th> <th>edf</th> <th>Ref.df</th> <th>Chi.sq</th> <th>p-value</th> </tr> </thead> <tbody> <tr> <td>s(Latitude)</td> <td>8</td> <td>8</td> <td>1562</td> <td>&lt;2e-16 ***</td> </tr> </tbody> </table> <p>---<br/>Signif. codes: 0 '***' 0.001 '**' 0.01 '*' 0.05 '.' 0.1 ' ' 1</p> <p>R-sq.(adj) = 0.97 Deviance explained = 99%<br/>-REML = 160.1 Scale est. = 1 n = 28</p> |            | Estimate | Std. Error   | z value | Pr(> z ) | (Intercept) | 4.533e+00 | 2.040e-01 | 22.225 | < 2e-16 *** | ShelfArea | 7.180e-07 | 2.048e-07 | 3.506 | 0.000454 *** |  | edf | Ref.df | Chi.sq | p-value | s(Latitude) | 8 | 8 | 1562 | <2e-16 *** |  <p>The bottom-left plot shows Richness (y-axis, 0 to 2500) versus Latitude (x-axis, -50 to 50). The curve is bimodal with peaks around -10 and 10, and a dip near 0. The bottom-right plot shows Richness (y-axis, 1000 to 5000) versus ShelfArea (x-axis, 0 to 1500000). The curve shows an increasing trend of Richness with ShelfArea.</p> |
|                             | Estimate                                                                                                                                                                                                                                                                                                                                                                                                                                                                                                                                                                                                                                                                                                                                                                                                                                                                                                                                                                                                                                                                                                     | Std. Error | z value  | Pr(> z )     |         |          |             |           |           |        |             |           |           |           |       |              |  |     |        |        |         |             |   |   |      |            |                                                                                                                                                                                                                                                                                                                                                                                                                                    |
| (Intercept)                 | 4.533e+00                                                                                                                                                                                                                                                                                                                                                                                                                                                                                                                                                                                                                                                                                                                                                                                                                                                                                                                                                                                                                                                                                                    | 2.040e-01  | 22.225   | < 2e-16 ***  |         |          |             |           |           |        |             |           |           |           |       |              |  |     |        |        |         |             |   |   |      |            |                                                                                                                                                                                                                                                                                                                                                                                                                                    |
| ShelfArea                   | 7.180e-07                                                                                                                                                                                                                                                                                                                                                                                                                                                                                                                                                                                                                                                                                                                                                                                                                                                                                                                                                                                                                                                                                                    | 2.048e-07  | 3.506    | 0.000454 *** |         |          |             |           |           |        |             |           |           |           |       |              |  |     |        |        |         |             |   |   |      |            |                                                                                                                                                                                                                                                                                                                                                                                                                                    |
|                             | edf                                                                                                                                                                                                                                                                                                                                                                                                                                                                                                                                                                                                                                                                                                                                                                                                                                                                                                                                                                                                                                                                                                          | Ref.df     | Chi.sq   | p-value      |         |          |             |           |           |        |             |           |           |           |       |              |  |     |        |        |         |             |   |   |      |            |                                                                                                                                                                                                                                                                                                                                                                                                                                    |
| s(Latitude)                 | 8                                                                                                                                                                                                                                                                                                                                                                                                                                                                                                                                                                                                                                                                                                                                                                                                                                                                                                                                                                                                                                                                                                            | 8          | 1562     | <2e-16 ***   |         |          |             |           |           |        |             |           |           |           |       |              |  |     |        |        |         |             |   |   |      |            |                                                                                                                                                                                                                                                                                                                                                                                                                                    |

|                                  |                                                                                                                                                                                                                                                                                                                                                                                                                                                                                                                                                                                                                                                                                                        |                                                                                      |                                                                                      |
|----------------------------------|--------------------------------------------------------------------------------------------------------------------------------------------------------------------------------------------------------------------------------------------------------------------------------------------------------------------------------------------------------------------------------------------------------------------------------------------------------------------------------------------------------------------------------------------------------------------------------------------------------------------------------------------------------------------------------------------------------|--------------------------------------------------------------------------------------|--------------------------------------------------------------------------------------|
| <p><b>Benthic chordates</b></p>  | <p>Family: Negative Binomial(8.386)<br/>Link function: log</p> <p>Formula:<br/>Richness ~ s(Latitude, k = 9, fx = T) + ShelfArea</p> <p>Parametric coefficients:<br/>Estimate Std. Error z value Pr(&gt; z )<br/>(Intercept) 6.067e+00 1.918e-01 31.630 &lt; 2e-16 ***<br/>ShelfArea 5.950e-07 1.980e-07 3.005 0.00266 **<br/>---<br/>Signif. codes: 0 '***' 0.001 '**' 0.01 '*' 0.05 '.' 0.1 ' ' 1</p> <p>Approximate significance of smooth terms:<br/>edf Ref.df Chi.sq p-value<br/>s(Latitude) 8 8 626.9 &lt;2e-16 ***<br/>---<br/>Signif. codes: 0 '***' 0.001 '**' 0.01 '*' 0.05 '.' 0.1 ' ' 1</p> <p>R-sq.(adj) = 0.879 Deviance explained = 93.5%<br/>-REML = 258.51 Scale est. = 1 n = 35</p> | 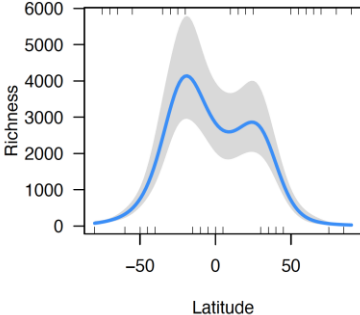  |   |
| <p><b>Benthopelagic fish</b></p> | <p>Family: Negative Binomial(13.414)<br/>Link function: log</p> <p>Formula:<br/>Richness ~ s(Latitude, k = 9, fx = T) + ShelfArea</p> <p>Parametric coefficients:<br/>Estimate Std. Error z value Pr(&gt; z )<br/>(Intercept) 4.089e+00 2.597e-01 15.744 &lt;2e-16 ***<br/>ShelfArea -4.181e-08 2.681e-07 -0.156 0.876<br/>---<br/>Signif. codes: 0 '***' 0.001 '**' 0.01 '*' 0.05 '.' 0.1 ' ' 1</p> <p>Approximate significance of smooth terms:<br/>edf Ref.df Chi.sq p-value<br/>s(Latitude) 8 8 298.9 &lt;2e-16 ***<br/>---<br/>Signif. codes: 0 '***' 0.001 '**' 0.01 '*' 0.05 '.' 0.1 ' ' 1</p> <p>R-sq.(adj) = 0.839 Deviance explained = 95.1%<br/>-REML = 143.94 Scale est. = 1 n = 30</p>    |  |  |

| <p><b>Bivalves</b></p>   | <p>Family: Negative Binomial(8.783)<br/>Link function: log</p> <p>Formula:<br/>Richness ~ s(Latitude, k = 9, fx = T) + ShelfArea</p> <p>Parametric coefficients:</p> <table border="1"> <thead> <tr> <th></th> <th>Estimate</th> <th>Std. Error</th> <th>z value</th> <th>Pr(&gt; z )</th> </tr> </thead> <tbody> <tr> <td>(Intercept)</td> <td>5.159e+00</td> <td>1.894e-01</td> <td>27.238</td> <td>&lt;2e-16 ***</td> </tr> <tr> <td>ShelfArea</td> <td>1.965e-07</td> <td>1.959e-07</td> <td>1.003</td> <td>0.316</td> </tr> </tbody> </table> <p>---<br/>Signif. codes: 0 '***' 0.001 '**' 0.01 '*' 0.05 '.' 0.1 ' ' 1</p> <p>Approximate significance of smooth terms:</p> <table border="1"> <thead> <tr> <th></th> <th>edf</th> <th>Ref.df</th> <th>Chi.sq</th> <th>p-value</th> </tr> </thead> <tbody> <tr> <td>s(Latitude)</td> <td>8</td> <td>8</td> <td>230.5</td> <td>&lt;2e-16 ***</td> </tr> </tbody> </table> <p>---<br/>Signif. codes: 0 '***' 0.001 '**' 0.01 '*' 0.05 '.' 0.1 ' ' 1</p> <p>R-sq.(adj) = 0.748    Deviance explained = 87.9%<br/>-REML = 211.88    Scale est. = 1            n = 35</p> |            | Estimate | Std. Error | z value | Pr(> z ) | (Intercept) | 5.159e+00 | 1.894e-01 | 27.238 | <2e-16 *** | ShelfArea | 1.965e-07 | 1.959e-07 | 1.003 | 0.316 |  | edf | Ref.df | Chi.sq | p-value | s(Latitude) | 8 | 8 | 230.5 | <2e-16 *** | 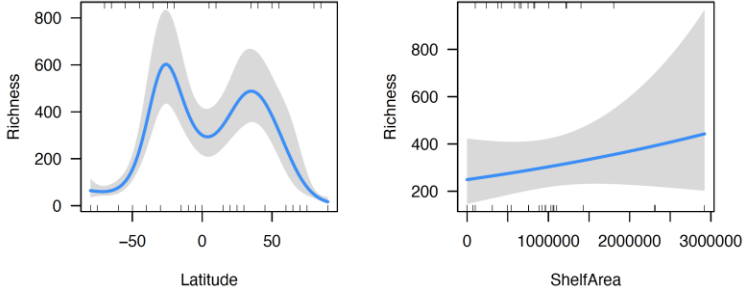 <p>The first plot shows Richness (y-axis, 0-800) versus Latitude (x-axis, -50 to 50). It features a blue line representing the smooth fit, which has two peaks: one around -25 and another around 25. A grey shaded area represents the confidence interval. The second plot shows Richness (y-axis, 0-800) versus ShelfArea (x-axis, 0 to 3,000,000). It shows a blue line that increases from approximately 250 at zero ShelfArea to about 450 at 3,000,000. A grey shaded area represents the confidence interval, which widens as ShelfArea increases.</p>     |
|--------------------------|---------------------------------------------------------------------------------------------------------------------------------------------------------------------------------------------------------------------------------------------------------------------------------------------------------------------------------------------------------------------------------------------------------------------------------------------------------------------------------------------------------------------------------------------------------------------------------------------------------------------------------------------------------------------------------------------------------------------------------------------------------------------------------------------------------------------------------------------------------------------------------------------------------------------------------------------------------------------------------------------------------------------------------------------------------------------------------------------------------------------------|------------|----------|------------|---------|----------|-------------|-----------|-----------|--------|------------|-----------|-----------|-----------|-------|-------|--|-----|--------|--------|---------|-------------|---|---|-------|------------|--------------------------------------------------------------------------------------------------------------------------------------------------------------------------------------------------------------------------------------------------------------------------------------------------------------------------------------------------------------------------------------------------------------------------------------------------------------------------------------------------------------------------------------------------------------------------------------------------------------------------------------------------------|
|                          | Estimate                                                                                                                                                                                                                                                                                                                                                                                                                                                                                                                                                                                                                                                                                                                                                                                                                                                                                                                                                                                                                                                                                                                  | Std. Error | z value  | Pr(> z )   |         |          |             |           |           |        |            |           |           |           |       |       |  |     |        |        |         |             |   |   |       |            |                                                                                                                                                                                                                                                                                                                                                                                                                                                                                                                                                                                                                                                        |
| (Intercept)              | 5.159e+00                                                                                                                                                                                                                                                                                                                                                                                                                                                                                                                                                                                                                                                                                                                                                                                                                                                                                                                                                                                                                                                                                                                 | 1.894e-01  | 27.238   | <2e-16 *** |         |          |             |           |           |        |            |           |           |           |       |       |  |     |        |        |         |             |   |   |       |            |                                                                                                                                                                                                                                                                                                                                                                                                                                                                                                                                                                                                                                                        |
| ShelfArea                | 1.965e-07                                                                                                                                                                                                                                                                                                                                                                                                                                                                                                                                                                                                                                                                                                                                                                                                                                                                                                                                                                                                                                                                                                                 | 1.959e-07  | 1.003    | 0.316      |         |          |             |           |           |        |            |           |           |           |       |       |  |     |        |        |         |             |   |   |       |            |                                                                                                                                                                                                                                                                                                                                                                                                                                                                                                                                                                                                                                                        |
|                          | edf                                                                                                                                                                                                                                                                                                                                                                                                                                                                                                                                                                                                                                                                                                                                                                                                                                                                                                                                                                                                                                                                                                                       | Ref.df     | Chi.sq   | p-value    |         |          |             |           |           |        |            |           |           |           |       |       |  |     |        |        |         |             |   |   |       |            |                                                                                                                                                                                                                                                                                                                                                                                                                                                                                                                                                                                                                                                        |
| s(Latitude)              | 8                                                                                                                                                                                                                                                                                                                                                                                                                                                                                                                                                                                                                                                                                                                                                                                                                                                                                                                                                                                                                                                                                                                         | 8          | 230.5    | <2e-16 *** |         |          |             |           |           |        |            |           |           |           |       |       |  |     |        |        |         |             |   |   |       |            |                                                                                                                                                                                                                                                                                                                                                                                                                                                                                                                                                                                                                                                        |
| <p><b>Gastropods</b></p> | <p>Family: Negative Binomial(5.844)<br/>Link function: log</p> <p>Formula:<br/>Richness ~ s(Latitude, k = 9, fx = T) + ShelfArea</p> <p>Parametric coefficients:</p> <table border="1"> <thead> <tr> <th></th> <th>Estimate</th> <th>Std. Error</th> <th>z value</th> <th>Pr(&gt; z )</th> </tr> </thead> <tbody> <tr> <td>(Intercept)</td> <td>5.671e+00</td> <td>2.314e-01</td> <td>24.506</td> <td>&lt;2e-16 ***</td> </tr> <tr> <td>ShelfArea</td> <td>3.492e-07</td> <td>2.388e-07</td> <td>1.462</td> <td>0.144</td> </tr> </tbody> </table> <p>---<br/>Signif. codes: 0 '***' 0.001 '**' 0.01 '*' 0.05 '.' 0.1 ' ' 1</p> <p>Approximate significance of smooth terms:</p> <table border="1"> <thead> <tr> <th></th> <th>edf</th> <th>Ref.df</th> <th>Chi.sq</th> <th>p-value</th> </tr> </thead> <tbody> <tr> <td>s(Latitude)</td> <td>8</td> <td>8</td> <td>267.6</td> <td>&lt;2e-16 ***</td> </tr> </tbody> </table> <p>---<br/>Signif. codes: 0 '***' 0.001 '**' 0.01 '*' 0.05 '.' 0.1 ' ' 1</p> <p>R-sq.(adj) = 0.737    Deviance explained = 88.5%<br/>-REML = 239.23    Scale est. = 1            n = 35</p> |            | Estimate | Std. Error | z value | Pr(> z ) | (Intercept) | 5.671e+00 | 2.314e-01 | 24.506 | <2e-16 *** | ShelfArea | 3.492e-07 | 2.388e-07 | 1.462 | 0.144 |  | edf | Ref.df | Chi.sq | p-value | s(Latitude) | 8 | 8 | 267.6 | <2e-16 *** |  <p>The first plot shows Richness (y-axis, 0-2500) versus Latitude (x-axis, -50 to 50). It features a blue line representing the smooth fit, which has two peaks: one around -25 and another around 25. A grey shaded area represents the confidence interval. The second plot shows Richness (y-axis, 0-4000) versus ShelfArea (x-axis, 0 to 3,000,000). It shows a blue line that increases from approximately 500 at zero ShelfArea to about 1500 at 3,000,000. A grey shaded area represents the confidence interval, which widens as ShelfArea increases.</p> |
|                          | Estimate                                                                                                                                                                                                                                                                                                                                                                                                                                                                                                                                                                                                                                                                                                                                                                                                                                                                                                                                                                                                                                                                                                                  | Std. Error | z value  | Pr(> z )   |         |          |             |           |           |        |            |           |           |           |       |       |  |     |        |        |         |             |   |   |       |            |                                                                                                                                                                                                                                                                                                                                                                                                                                                                                                                                                                                                                                                        |
| (Intercept)              | 5.671e+00                                                                                                                                                                                                                                                                                                                                                                                                                                                                                                                                                                                                                                                                                                                                                                                                                                                                                                                                                                                                                                                                                                                 | 2.314e-01  | 24.506   | <2e-16 *** |         |          |             |           |           |        |            |           |           |           |       |       |  |     |        |        |         |             |   |   |       |            |                                                                                                                                                                                                                                                                                                                                                                                                                                                                                                                                                                                                                                                        |
| ShelfArea                | 3.492e-07                                                                                                                                                                                                                                                                                                                                                                                                                                                                                                                                                                                                                                                                                                                                                                                                                                                                                                                                                                                                                                                                                                                 | 2.388e-07  | 1.462    | 0.144      |         |          |             |           |           |        |            |           |           |           |       |       |  |     |        |        |         |             |   |   |       |            |                                                                                                                                                                                                                                                                                                                                                                                                                                                                                                                                                                                                                                                        |
|                          | edf                                                                                                                                                                                                                                                                                                                                                                                                                                                                                                                                                                                                                                                                                                                                                                                                                                                                                                                                                                                                                                                                                                                       | Ref.df     | Chi.sq   | p-value    |         |          |             |           |           |        |            |           |           |           |       |       |  |     |        |        |         |             |   |   |       |            |                                                                                                                                                                                                                                                                                                                                                                                                                                                                                                                                                                                                                                                        |
| s(Latitude)              | 8                                                                                                                                                                                                                                                                                                                                                                                                                                                                                                                                                                                                                                                                                                                                                                                                                                                                                                                                                                                                                                                                                                                         | 8          | 267.6    | <2e-16 *** |         |          |             |           |           |        |            |           |           |           |       |       |  |     |        |        |         |             |   |   |       |            |                                                                                                                                                                                                                                                                                                                                                                                                                                                                                                                                                                                                                                                        |

**Benthic  
arthropods**

```

Family: Negative Binomial(9.534)
Link function: log

Formula:
Richness ~ s(Latitude, k = 9, fx = T) + ShelfArea

Parametric coefficients:
      Estimate Std. Error z value Pr(>|z|)
(Intercept) 6.308e+00  1.766e-01  35.710  <2e-16 ***
ShelfArea   3.313e-07  1.827e-07   1.813  0.0698 .
---
Signif. codes:  0 '***' 0.001 '**' 0.01 '*' 0.05 '.' 0.1 ' ' 1

Approximate significance of smooth terms:
      edf Ref.df Chi.sq p-value
s(Latitude)  8      8 268.2  <2e-16 ***
---
Signif. codes:  0 '***' 0.001 '**' 0.01 '*' 0.05 '.' 0.1 ' ' 1

R-sq.(adj) = 0.685  Deviance explained = 87.8%
-REML = 254.76  Scale est. = 1          n = 35

```

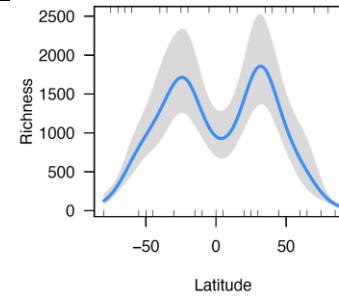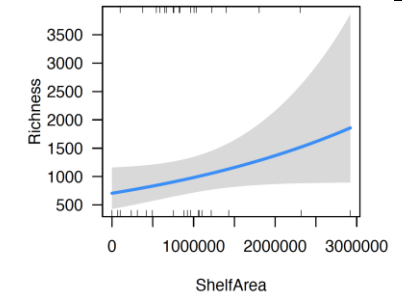



**Table S3.** Summary of GAM results obtained from the model of species richness as a function of SST (Figure 2). All models were significant with  $P < 2e-16$ , edf = 4, Ref.df = 4, scale estimate = 1.

| Group                       | Parametric coefficients |           |         |         | Rsqr.(adj)   | -REML | Deviance explained | n  |
|-----------------------------|-------------------------|-----------|---------|---------|--------------|-------|--------------------|----|
|                             | Estimate                | Std.Error | Z value | Chi. sq |              |       |                    |    |
| <b>All Species</b>          | 7.87                    | 0.08      | 92.4    | 151.0   | <b>0.863</b> | 297.6 | 77.8%              | 35 |
| <b>Pelagic species</b>      | 5.81                    | 0.07      | 73.1    | 182.2   | <b>0.889</b> | 224.4 | 79.7%              | 35 |
| <b>Benthic species</b>      | 7.81                    | 0.07      | 107.5   | 175.2   | <b>0.839</b> | 175.2 | 81.6%              | 34 |
| <b>Bathydemersal fish</b>   | 5.45                    | 0.06      | 88.53   | 119.8   | <b>0.619</b> | 142.6 | 81.9%              | 25 |
| <b>Demersal fish</b>        | 6.22                    | 0.06      | 95.44   | 350.8   | <b>0.843</b> | 170.0 | 91.7%              | 26 |
| <b>Reef associated fish</b> | 6.08                    | 0.09      | 66.96   | 221.4   | <b>0.836</b> | 142.9 | 91.5%              | 22 |
| <b>Benthic Chordates</b>    | 7.01                    | 0.05      | 128.3   | 362.4   | <b>0.858</b> | 220.5 | 91.6%              | 30 |
| <b>Benthopelagic fish</b>   | 4.73                    | 0.08      | 56.97   | 69.4    | <b>0.622</b> | 110.7 | 84.2%              | 22 |
| <b>Bivalves</b>             | 5.51                    | 0.06      | 81.77   | 118.4   | <b>0.611</b> | 189.9 | 77.5%              | 32 |
| <b>Gastropods</b>           | 6.31                    | 0.07      | 85.45   | 134.4   | <b>0.707</b> | 225.2 | 79.1%              | 33 |
| <b>Benthic arthropods</b>   | 6.76                    | 0.07      | 88.61   | 75.0    | <b>0.671</b> | 248.3 | 66.0%              | 34 |
| <b>Pelagic Chordates</b>    | 5.71                    | 0.07      | 73.26   | 200.8   | <b>0.887</b> | 221.0 | 80.8%              | 35 |
| <b>Bathypelagic fish</b>    | 5.60                    | 0.04      | 113.5   | 260.8   | <b>0.799</b> | 141.7 | 91.2%              | 25 |

**Table S4.** Information on the full GAM models for Figure 3.

| Group       | Period    | Model summary                                                                                                                                                                                                                                                                                                                                                                                                                                                                                                                                                                                                                                                                                      | Plots                                                                                |                                                                                      |
|-------------|-----------|----------------------------------------------------------------------------------------------------------------------------------------------------------------------------------------------------------------------------------------------------------------------------------------------------------------------------------------------------------------------------------------------------------------------------------------------------------------------------------------------------------------------------------------------------------------------------------------------------------------------------------------------------------------------------------------------------|--------------------------------------------------------------------------------------|--------------------------------------------------------------------------------------|
| All species | 1955-1974 | <p>Family: Negative Binomial(17.398)<br/>Link function: log</p> <p>Formula:<br/>Richness ~ s(Latitude, k = 9, fx = T) + ShelfArea</p> <p>Parametric coefficients:<br/>Estimate Std. Error z value Pr(&gt; z )<br/>(Intercept) 7.480e+00 1.309e-01 57.162 &lt;2e-16 ***<br/>ShelfArea 6.535e-08 1.355e-07 0.482 0.63<br/>---<br/>Signif. codes: 0 '***' 0.001 '**' 0.01 '*' 0.05 '.' 0.1 ' ' 1</p> <p>Approximate significance of smooth terms:<br/>edf Ref.df Chi.sq p-value<br/>s(Latitude) 8 8 688.8 &lt;2e-16 ***<br/>---<br/>Signif. codes: 0 '***' 0.001 '**' 0.01 '*' 0.05 '.' 0.1 ' ' 1</p> <p>R-sq.(adj) = 0.79 Deviance explained = 94.6%<br/>-REML = 280.08 Scale est. = 1 n = 35</p>    | 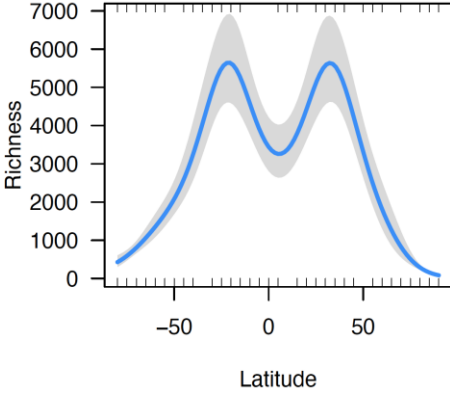  |   |
| All species | 1975-1994 | <p>Family: Negative Binomial(12.922)<br/>Link function: log</p> <p>Formula:<br/>Richness ~ s(Latitude, k = 9, fx = T) + ShelfArea</p> <p>Parametric coefficients:<br/>Estimate Std. Error z value Pr(&gt; z )<br/>(Intercept) 7.370e+00 1.506e-01 48.92 &lt;2e-16 ***<br/>ShelfArea 3.242e-07 1.559e-07 2.08 0.0375 *<br/>---<br/>Signif. codes: 0 '***' 0.001 '**' 0.01 '*' 0.05 '.' 0.1 ' ' 1</p> <p>Approximate significance of smooth terms:<br/>edf Ref.df Chi.sq p-value<br/>s(Latitude) 8 8 568.8 &lt;2e-16 ***<br/>---<br/>Signif. codes: 0 '***' 0.001 '**' 0.01 '*' 0.05 '.' 0.1 ' ' 1</p> <p>R-sq.(adj) = 0.842 Deviance explained = 93.8%<br/>-REML = 288.03 Scale est. = 1 n = 35</p> |  |  |

| All species     | 1995-2015 | <p>Family: Negative Binomial(6.043)<br/>Link function: log</p> <p>Formula:<br/>Richness ~ s(Latitude, k = 9, fx = T) + ShelfArea</p> <p>Parametric coefficients:</p> <table border="1"> <thead> <tr> <th></th> <th>Estimate</th> <th>Std. Error</th> <th>z value</th> <th>Pr(&gt; z )</th> </tr> </thead> <tbody> <tr> <td>(Intercept)</td> <td>7.227e+00</td> <td>2.190e-01</td> <td>32.993</td> <td>&lt;2e-16 ***</td> </tr> <tr> <td>ShelfArea</td> <td>3.860e-07</td> <td>2.267e-07</td> <td>1.703</td> <td>0.0886 .</td> </tr> </tbody> </table> <p>---<br/>Signif. codes: 0 '***' 0.001 '**' 0.01 '*' 0.05 '.' 0.1 ' ' 1</p> <p>Approximate significance of smooth terms:</p> <table border="1"> <thead> <tr> <th></th> <th>edf</th> <th>Ref.df</th> <th>Chi.sq</th> <th>p-value</th> </tr> </thead> <tbody> <tr> <td>s(Latitude)</td> <td>8</td> <td>8</td> <td>224.8</td> <td>&lt;2e-16 ***</td> </tr> </tbody> </table> <p>---<br/>Signif. codes: 0 '***' 0.001 '**' 0.01 '*' 0.05 '.' 0.1 ' ' 1</p> <p>R-sq.(adj) = 0.746 Deviance explained = 85.7%<br/>-REML = 293.59 Scale est. = 1 n = 35</p> |         | Estimate   | Std. Error | z value | Pr(> z ) | (Intercept) | 7.227e+00 | 2.190e-01 | 32.993 | <2e-16 *** | ShelfArea | 3.860e-07 | 2.267e-07 | 1.703 | 0.0886 . |  | edf | Ref.df | Chi.sq | p-value | s(Latitude) | 8 | 8 | 224.8 | <2e-16 *** | 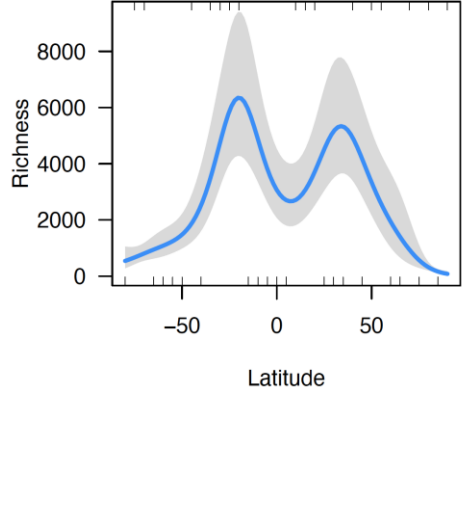  |   |
|-----------------|-----------|-------------------------------------------------------------------------------------------------------------------------------------------------------------------------------------------------------------------------------------------------------------------------------------------------------------------------------------------------------------------------------------------------------------------------------------------------------------------------------------------------------------------------------------------------------------------------------------------------------------------------------------------------------------------------------------------------------------------------------------------------------------------------------------------------------------------------------------------------------------------------------------------------------------------------------------------------------------------------------------------------------------------------------------------------------------------------------------------------------------|---------|------------|------------|---------|----------|-------------|-----------|-----------|--------|------------|-----------|-----------|-----------|-------|----------|--|-----|--------|--------|---------|-------------|---|---|-------|------------|--------------------------------------------------------------------------------------|--------------------------------------------------------------------------------------|
|                 | Estimate  | Std. Error                                                                                                                                                                                                                                                                                                                                                                                                                                                                                                                                                                                                                                                                                                                                                                                                                                                                                                                                                                                                                                                                                                  | z value | Pr(> z )   |            |         |          |             |           |           |        |            |           |           |           |       |          |  |     |        |        |         |             |   |   |       |            |                                                                                      |                                                                                      |
| (Intercept)     | 7.227e+00 | 2.190e-01                                                                                                                                                                                                                                                                                                                                                                                                                                                                                                                                                                                                                                                                                                                                                                                                                                                                                                                                                                                                                                                                                                   | 32.993  | <2e-16 *** |            |         |          |             |           |           |        |            |           |           |           |       |          |  |     |        |        |         |             |   |   |       |            |                                                                                      |                                                                                      |
| ShelfArea       | 3.860e-07 | 2.267e-07                                                                                                                                                                                                                                                                                                                                                                                                                                                                                                                                                                                                                                                                                                                                                                                                                                                                                                                                                                                                                                                                                                   | 1.703   | 0.0886 .   |            |         |          |             |           |           |        |            |           |           |           |       |          |  |     |        |        |         |             |   |   |       |            |                                                                                      |                                                                                      |
|                 | edf       | Ref.df                                                                                                                                                                                                                                                                                                                                                                                                                                                                                                                                                                                                                                                                                                                                                                                                                                                                                                                                                                                                                                                                                                      | Chi.sq  | p-value    |            |         |          |             |           |           |        |            |           |           |           |       |          |  |     |        |        |         |             |   |   |       |            |                                                                                      |                                                                                      |
| s(Latitude)     | 8         | 8                                                                                                                                                                                                                                                                                                                                                                                                                                                                                                                                                                                                                                                                                                                                                                                                                                                                                                                                                                                                                                                                                                           | 224.8   | <2e-16 *** |            |         |          |             |           |           |        |            |           |           |           |       |          |  |     |        |        |         |             |   |   |       |            |                                                                                      |                                                                                      |
| Pelagic species | 1955-1974 | <p>Family: Negative Binomial(12.064)<br/>Link function: log</p> <p>Formula:<br/>Richness ~ s(Latitude, k = 9, fx = T) + ShelfArea</p> <p>Parametric coefficients:</p> <table border="1"> <thead> <tr> <th></th> <th>Estimate</th> <th>Std. Error</th> <th>z value</th> <th>Pr(&gt; z )</th> </tr> </thead> <tbody> <tr> <td>(Intercept)</td> <td>5.875e+00</td> <td>1.610e-01</td> <td>36.497</td> <td>&lt;2e-16 ***</td> </tr> <tr> <td>ShelfArea</td> <td>2.099e-07</td> <td>1.664e-07</td> <td>1.261</td> <td>0.207</td> </tr> </tbody> </table> <p>---<br/>Signif. codes: 0 '***' 0.001 '**' 0.01 '*' 0.05 '.' 0.1 ' ' 1</p> <p>Approximate significance of smooth terms:</p> <table border="1"> <thead> <tr> <th></th> <th>edf</th> <th>Ref.df</th> <th>Chi.sq</th> <th>p-value</th> </tr> </thead> <tbody> <tr> <td>s(Latitude)</td> <td>8</td> <td>8</td> <td>398</td> <td>&lt;2e-16 ***</td> </tr> </tbody> </table> <p>---<br/>Signif. codes: 0 '***' 0.001 '**' 0.01 '*' 0.05 '.' 0.1 ' ' 1</p> <p>R-sq.(adj) = 0.834 Deviance explained = 92.1%<br/>-REML = 233.42 Scale est. = 1 n = 35</p>     |         | Estimate   | Std. Error | z value | Pr(> z ) | (Intercept) | 5.875e+00 | 1.610e-01 | 36.497 | <2e-16 *** | ShelfArea | 2.099e-07 | 1.664e-07 | 1.261 | 0.207    |  | edf | Ref.df | Chi.sq | p-value | s(Latitude) | 8 | 8 | 398   | <2e-16 *** |  |  |
|                 | Estimate  | Std. Error                                                                                                                                                                                                                                                                                                                                                                                                                                                                                                                                                                                                                                                                                                                                                                                                                                                                                                                                                                                                                                                                                                  | z value | Pr(> z )   |            |         |          |             |           |           |        |            |           |           |           |       |          |  |     |        |        |         |             |   |   |       |            |                                                                                      |                                                                                      |
| (Intercept)     | 5.875e+00 | 1.610e-01                                                                                                                                                                                                                                                                                                                                                                                                                                                                                                                                                                                                                                                                                                                                                                                                                                                                                                                                                                                                                                                                                                   | 36.497  | <2e-16 *** |            |         |          |             |           |           |        |            |           |           |           |       |          |  |     |        |        |         |             |   |   |       |            |                                                                                      |                                                                                      |
| ShelfArea       | 2.099e-07 | 1.664e-07                                                                                                                                                                                                                                                                                                                                                                                                                                                                                                                                                                                                                                                                                                                                                                                                                                                                                                                                                                                                                                                                                                   | 1.261   | 0.207      |            |         |          |             |           |           |        |            |           |           |           |       |          |  |     |        |        |         |             |   |   |       |            |                                                                                      |                                                                                      |
|                 | edf       | Ref.df                                                                                                                                                                                                                                                                                                                                                                                                                                                                                                                                                                                                                                                                                                                                                                                                                                                                                                                                                                                                                                                                                                      | Chi.sq  | p-value    |            |         |          |             |           |           |        |            |           |           |           |       |          |  |     |        |        |         |             |   |   |       |            |                                                                                      |                                                                                      |
| s(Latitude)     | 8         | 8                                                                                                                                                                                                                                                                                                                                                                                                                                                                                                                                                                                                                                                                                                                                                                                                                                                                                                                                                                                                                                                                                                           | 398     | <2e-16 *** |            |         |          |             |           |           |        |            |           |           |           |       |          |  |     |        |        |         |             |   |   |       |            |                                                                                      |                                                                                      |

| Pelagic species | 1975-1994 | <p>Family: Negative Binomial(18.16)<br/>Link function: log</p> <p>Formula:<br/>Richness ~ s(Latitude, k = 9, fx = T) + ShelfArea</p> <p>Parametric coefficients:</p> <table border="1"> <thead> <tr> <th></th> <th>Estimate</th> <th>Std. Error</th> <th>z value</th> <th>Pr(&gt; z )</th> </tr> </thead> <tbody> <tr> <td>(Intercept)</td> <td>5.893e+00</td> <td>1.346e-01</td> <td>43.770</td> <td>&lt;2e-16 ***</td> </tr> <tr> <td>ShelfArea</td> <td>8.915e-08</td> <td>1.391e-07</td> <td>0.641</td> <td>0.522</td> </tr> </tbody> </table> <p>---<br/>Signif. codes: 0 '***' 0.001 '**' 0.01 '*' 0.05 '.' 0.1 ' ' 1</p> <p>Approximate significance of smooth terms:</p> <table border="1"> <thead> <tr> <th></th> <th>edf</th> <th>Ref.df</th> <th>Chi.sq</th> <th>p-value</th> </tr> </thead> <tbody> <tr> <td>s(Latitude)</td> <td>8</td> <td>8</td> <td>574.1</td> <td>&lt;2e-16 ***</td> </tr> </tbody> </table> <p>---<br/>Signif. codes: 0 '***' 0.001 '**' 0.01 '*' 0.05 '.' 0.1 ' ' 1</p> <p>R-sq.(adj) = 0.896    Deviance explained = 94.6%<br/>-REML = 225.83    Scale est. = 1            n = 35</p>  |         | Estimate   | Std. Error | z value | Pr(> z ) | (Intercept) | 5.893e+00 | 1.346e-01 | 43.770 | <2e-16 *** | ShelfArea | 8.915e-08 | 1.391e-07 | 0.641 | 0.522 |  | edf | Ref.df | Chi.sq | p-value | s(Latitude) | 8 | 8 | 574.1 | <2e-16 *** |  |  |
|-----------------|-----------|----------------------------------------------------------------------------------------------------------------------------------------------------------------------------------------------------------------------------------------------------------------------------------------------------------------------------------------------------------------------------------------------------------------------------------------------------------------------------------------------------------------------------------------------------------------------------------------------------------------------------------------------------------------------------------------------------------------------------------------------------------------------------------------------------------------------------------------------------------------------------------------------------------------------------------------------------------------------------------------------------------------------------------------------------------------------------------------------------------------------------|---------|------------|------------|---------|----------|-------------|-----------|-----------|--------|------------|-----------|-----------|-----------|-------|-------|--|-----|--------|--------|---------|-------------|---|---|-------|------------|--|--|
|                 | Estimate  | Std. Error                                                                                                                                                                                                                                                                                                                                                                                                                                                                                                                                                                                                                                                                                                                                                                                                                                                                                                                                                                                                                                                                                                                 | z value | Pr(> z )   |            |         |          |             |           |           |        |            |           |           |           |       |       |  |     |        |        |         |             |   |   |       |            |  |  |
| (Intercept)     | 5.893e+00 | 1.346e-01                                                                                                                                                                                                                                                                                                                                                                                                                                                                                                                                                                                                                                                                                                                                                                                                                                                                                                                                                                                                                                                                                                                  | 43.770  | <2e-16 *** |            |         |          |             |           |           |        |            |           |           |           |       |       |  |     |        |        |         |             |   |   |       |            |  |  |
| ShelfArea       | 8.915e-08 | 1.391e-07                                                                                                                                                                                                                                                                                                                                                                                                                                                                                                                                                                                                                                                                                                                                                                                                                                                                                                                                                                                                                                                                                                                  | 0.641   | 0.522      |            |         |          |             |           |           |        |            |           |           |           |       |       |  |     |        |        |         |             |   |   |       |            |  |  |
|                 | edf       | Ref.df                                                                                                                                                                                                                                                                                                                                                                                                                                                                                                                                                                                                                                                                                                                                                                                                                                                                                                                                                                                                                                                                                                                     | Chi.sq  | p-value    |            |         |          |             |           |           |        |            |           |           |           |       |       |  |     |        |        |         |             |   |   |       |            |  |  |
| s(Latitude)     | 8         | 8                                                                                                                                                                                                                                                                                                                                                                                                                                                                                                                                                                                                                                                                                                                                                                                                                                                                                                                                                                                                                                                                                                                          | 574.1   | <2e-16 *** |            |         |          |             |           |           |        |            |           |           |           |       |       |  |     |        |        |         |             |   |   |       |            |  |  |
| Pelagic species | 1995-2015 | <p>Family: Negative Binomial(12.523)<br/>Link function: log</p> <p>Formula:<br/>Richness ~ s(Latitude, k = 9, fx = T) + ShelfArea</p> <p>Parametric coefficients:</p> <table border="1"> <thead> <tr> <th></th> <th>Estimate</th> <th>Std. Error</th> <th>z value</th> <th>Pr(&gt; z )</th> </tr> </thead> <tbody> <tr> <td>(Intercept)</td> <td>5.627e+00</td> <td>1.579e-01</td> <td>35.643</td> <td>&lt;2e-16 ***</td> </tr> <tr> <td>ShelfArea</td> <td>2.014e-07</td> <td>1.631e-07</td> <td>1.235</td> <td>0.217</td> </tr> </tbody> </table> <p>---<br/>Signif. codes: 0 '***' 0.001 '**' 0.01 '*' 0.05 '.' 0.1 ' ' 1</p> <p>Approximate significance of smooth terms:</p> <table border="1"> <thead> <tr> <th></th> <th>edf</th> <th>Ref.df</th> <th>Chi.sq</th> <th>p-value</th> </tr> </thead> <tbody> <tr> <td>s(Latitude)</td> <td>8</td> <td>8</td> <td>282.6</td> <td>&lt;2e-16 ***</td> </tr> </tbody> </table> <p>---<br/>Signif. codes: 0 '***' 0.001 '**' 0.01 '*' 0.05 '.' 0.1 ' ' 1</p> <p>R-sq.(adj) = 0.824    Deviance explained = 89.1%<br/>-REML = 224.82    Scale est. = 1            n = 35</p> |         | Estimate   | Std. Error | z value | Pr(> z ) | (Intercept) | 5.627e+00 | 1.579e-01 | 35.643 | <2e-16 *** | ShelfArea | 2.014e-07 | 1.631e-07 | 1.235 | 0.217 |  | edf | Ref.df | Chi.sq | p-value | s(Latitude) | 8 | 8 | 282.6 | <2e-16 *** |  |  |
|                 | Estimate  | Std. Error                                                                                                                                                                                                                                                                                                                                                                                                                                                                                                                                                                                                                                                                                                                                                                                                                                                                                                                                                                                                                                                                                                                 | z value | Pr(> z )   |            |         |          |             |           |           |        |            |           |           |           |       |       |  |     |        |        |         |             |   |   |       |            |  |  |
| (Intercept)     | 5.627e+00 | 1.579e-01                                                                                                                                                                                                                                                                                                                                                                                                                                                                                                                                                                                                                                                                                                                                                                                                                                                                                                                                                                                                                                                                                                                  | 35.643  | <2e-16 *** |            |         |          |             |           |           |        |            |           |           |           |       |       |  |     |        |        |         |             |   |   |       |            |  |  |
| ShelfArea       | 2.014e-07 | 1.631e-07                                                                                                                                                                                                                                                                                                                                                                                                                                                                                                                                                                                                                                                                                                                                                                                                                                                                                                                                                                                                                                                                                                                  | 1.235   | 0.217      |            |         |          |             |           |           |        |            |           |           |           |       |       |  |     |        |        |         |             |   |   |       |            |  |  |
|                 | edf       | Ref.df                                                                                                                                                                                                                                                                                                                                                                                                                                                                                                                                                                                                                                                                                                                                                                                                                                                                                                                                                                                                                                                                                                                     | Chi.sq  | p-value    |            |         |          |             |           |           |        |            |           |           |           |       |       |  |     |        |        |         |             |   |   |       |            |  |  |
| s(Latitude)     | 8         | 8                                                                                                                                                                                                                                                                                                                                                                                                                                                                                                                                                                                                                                                                                                                                                                                                                                                                                                                                                                                                                                                                                                                          | 282.6   | <2e-16 *** |            |         |          |             |           |           |        |            |           |           |           |       |       |  |     |        |        |         |             |   |   |       |            |  |  |

| Benthic species | 1955-1974 | <p>Family: Negative Binomial(13.623)<br/>Link function: log</p> <p>Formula:<br/>Richness ~ s(Latitude, k = 9, fx = T) + ShelfArea</p> <p>Parametric coefficients:</p> <table border="1"> <thead> <tr> <th></th> <th>Estimate</th> <th>Std. Error</th> <th>z value</th> <th>Pr(&gt; z )</th> </tr> </thead> <tbody> <tr> <td>(Intercept)</td> <td>7.111e+00</td> <td>1.493e-01</td> <td>47.625</td> <td>&lt;2e-16 ***</td> </tr> <tr> <td>ShelfArea</td> <td>1.361e-07</td> <td>1.545e-07</td> <td>0.881</td> <td>0.378</td> </tr> </tbody> </table> <p>---<br/>Signif. codes: 0 '***' 0.001 '**' 0.01 '*' 0.05 '.' 0.1 ' ' 1</p> <p>Approximate significance of smooth terms:</p> <table border="1"> <thead> <tr> <th></th> <th>edf</th> <th>Ref.df</th> <th>Chi.sq</th> <th>p-value</th> </tr> </thead> <tbody> <tr> <td>s(Latitude)</td> <td>8</td> <td>8</td> <td>607.3</td> <td>&lt;2e-16 ***</td> </tr> </tbody> </table> <p>---<br/>Signif. codes: 0 '***' 0.001 '**' 0.01 '*' 0.05 '.' 0.1 ' ' 1</p> <p>R-sq.(adj) = 0.755 Deviance explained = 93.6%<br/>-REML = 273.04 Scale est. = 1 n = 35</p>   |         | Estimate   | Std. Error | z value | Pr(> z ) | (Intercept) | 7.111e+00 | 1.493e-01 | 47.625 | <2e-16 *** | ShelfArea | 1.361e-07 | 1.545e-07 | 0.881 | 0.378    |  | edf | Ref.df | Chi.sq | p-value | s(Latitude) | 8 | 8 | 607.3 | <2e-16 *** |  |  |
|-----------------|-----------|-------------------------------------------------------------------------------------------------------------------------------------------------------------------------------------------------------------------------------------------------------------------------------------------------------------------------------------------------------------------------------------------------------------------------------------------------------------------------------------------------------------------------------------------------------------------------------------------------------------------------------------------------------------------------------------------------------------------------------------------------------------------------------------------------------------------------------------------------------------------------------------------------------------------------------------------------------------------------------------------------------------------------------------------------------------------------------------------------------------|---------|------------|------------|---------|----------|-------------|-----------|-----------|--------|------------|-----------|-----------|-----------|-------|----------|--|-----|--------|--------|---------|-------------|---|---|-------|------------|--|--|
|                 | Estimate  | Std. Error                                                                                                                                                                                                                                                                                                                                                                                                                                                                                                                                                                                                                                                                                                                                                                                                                                                                                                                                                                                                                                                                                                  | z value | Pr(> z )   |            |         |          |             |           |           |        |            |           |           |           |       |          |  |     |        |        |         |             |   |   |       |            |  |  |
| (Intercept)     | 7.111e+00 | 1.493e-01                                                                                                                                                                                                                                                                                                                                                                                                                                                                                                                                                                                                                                                                                                                                                                                                                                                                                                                                                                                                                                                                                                   | 47.625  | <2e-16 *** |            |         |          |             |           |           |        |            |           |           |           |       |          |  |     |        |        |         |             |   |   |       |            |  |  |
| ShelfArea       | 1.361e-07 | 1.545e-07                                                                                                                                                                                                                                                                                                                                                                                                                                                                                                                                                                                                                                                                                                                                                                                                                                                                                                                                                                                                                                                                                                   | 0.881   | 0.378      |            |         |          |             |           |           |        |            |           |           |           |       |          |  |     |        |        |         |             |   |   |       |            |  |  |
|                 | edf       | Ref.df                                                                                                                                                                                                                                                                                                                                                                                                                                                                                                                                                                                                                                                                                                                                                                                                                                                                                                                                                                                                                                                                                                      | Chi.sq  | p-value    |            |         |          |             |           |           |        |            |           |           |           |       |          |  |     |        |        |         |             |   |   |       |            |  |  |
| s(Latitude)     | 8         | 8                                                                                                                                                                                                                                                                                                                                                                                                                                                                                                                                                                                                                                                                                                                                                                                                                                                                                                                                                                                                                                                                                                           | 607.3   | <2e-16 *** |            |         |          |             |           |           |        |            |           |           |           |       |          |  |     |        |        |         |             |   |   |       |            |  |  |
| Benthic species | 1975-1994 | <p>Family: Negative Binomial(9.041)<br/>Link function: log</p> <p>Formula:<br/>Richness ~ s(Latitude, k = 9, fx = T) + ShelfArea</p> <p>Parametric coefficients:</p> <table border="1"> <thead> <tr> <th></th> <th>Estimate</th> <th>Std. Error</th> <th>z value</th> <th>Pr(&gt; z )</th> </tr> </thead> <tbody> <tr> <td>(Intercept)</td> <td>7.046e+00</td> <td>1.801e-01</td> <td>39.115</td> <td>&lt;2e-16 ***</td> </tr> <tr> <td>ShelfArea</td> <td>4.343e-07</td> <td>1.864e-07</td> <td>2.331</td> <td>0.0198 *</td> </tr> </tbody> </table> <p>---<br/>Signif. codes: 0 '***' 0.001 '**' 0.01 '*' 0.05 '.' 0.1 ' ' 1</p> <p>Approximate significance of smooth terms:</p> <table border="1"> <thead> <tr> <th></th> <th>edf</th> <th>Ref.df</th> <th>Chi.sq</th> <th>p-value</th> </tr> </thead> <tbody> <tr> <td>s(Latitude)</td> <td>8</td> <td>8</td> <td>435.3</td> <td>&lt;2e-16 ***</td> </tr> </tbody> </table> <p>---<br/>Signif. codes: 0 '***' 0.001 '**' 0.01 '*' 0.05 '.' 0.1 ' ' 1</p> <p>R-sq.(adj) = 0.808 Deviance explained = 91.9%<br/>-REML = 284.46 Scale est. = 1 n = 35</p> |         | Estimate   | Std. Error | z value | Pr(> z ) | (Intercept) | 7.046e+00 | 1.801e-01 | 39.115 | <2e-16 *** | ShelfArea | 4.343e-07 | 1.864e-07 | 2.331 | 0.0198 * |  | edf | Ref.df | Chi.sq | p-value | s(Latitude) | 8 | 8 | 435.3 | <2e-16 *** |  |  |
|                 | Estimate  | Std. Error                                                                                                                                                                                                                                                                                                                                                                                                                                                                                                                                                                                                                                                                                                                                                                                                                                                                                                                                                                                                                                                                                                  | z value | Pr(> z )   |            |         |          |             |           |           |        |            |           |           |           |       |          |  |     |        |        |         |             |   |   |       |            |  |  |
| (Intercept)     | 7.046e+00 | 1.801e-01                                                                                                                                                                                                                                                                                                                                                                                                                                                                                                                                                                                                                                                                                                                                                                                                                                                                                                                                                                                                                                                                                                   | 39.115  | <2e-16 *** |            |         |          |             |           |           |        |            |           |           |           |       |          |  |     |        |        |         |             |   |   |       |            |  |  |
| ShelfArea       | 4.343e-07 | 1.864e-07                                                                                                                                                                                                                                                                                                                                                                                                                                                                                                                                                                                                                                                                                                                                                                                                                                                                                                                                                                                                                                                                                                   | 2.331   | 0.0198 *   |            |         |          |             |           |           |        |            |           |           |           |       |          |  |     |        |        |         |             |   |   |       |            |  |  |
|                 | edf       | Ref.df                                                                                                                                                                                                                                                                                                                                                                                                                                                                                                                                                                                                                                                                                                                                                                                                                                                                                                                                                                                                                                                                                                      | Chi.sq  | p-value    |            |         |          |             |           |           |        |            |           |           |           |       |          |  |     |        |        |         |             |   |   |       |            |  |  |
| s(Latitude)     | 8         | 8                                                                                                                                                                                                                                                                                                                                                                                                                                                                                                                                                                                                                                                                                                                                                                                                                                                                                                                                                                                                                                                                                                           | 435.3   | <2e-16 *** |            |         |          |             |           |           |        |            |           |           |           |       |          |  |     |        |        |         |             |   |   |       |            |  |  |

|                        |                  |                                                                                                                                                                                                                                                                                                                                                                                                                                                                                                                                                                                                                                                                     |                                                                                     |                                                                                     |
|------------------------|------------------|---------------------------------------------------------------------------------------------------------------------------------------------------------------------------------------------------------------------------------------------------------------------------------------------------------------------------------------------------------------------------------------------------------------------------------------------------------------------------------------------------------------------------------------------------------------------------------------------------------------------------------------------------------------------|-------------------------------------------------------------------------------------|-------------------------------------------------------------------------------------|
| <p>Benthic species</p> | <p>1995-2015</p> | <pre> Family: Negative Binomial(4.733) Link function: log  Formula: Richness ~ s(Latitude, k = 9, fx = T) + ShelfArea  Parametric coefficients:       Estimate Std. Error z value Pr(&gt; z ) (Intercept) 6.924e+00 2.481e-01 27.912 &lt;2e-16 *** ShelfArea   4.691e-07 2.567e-07  1.827  0.0677 . --- Signif. codes:  0 '***' 0.001 '**' 0.01 '*' 0.05 '.' 0.1 ' ' 1  Approximate significance of smooth terms:       edf Ref.df Chi.sq p-value s(Latitude) 8      8 217.2 &lt;2e-16 *** --- Signif. codes:  0 '***' 0.001 '**' 0.01 '*' 0.05 '.' 0.1 ' ' 1  R-sq.(adj) = 0.722  Deviance explained = 84.4% -REML = 288.28  Scale est. = 1          n = 35 </pre> | 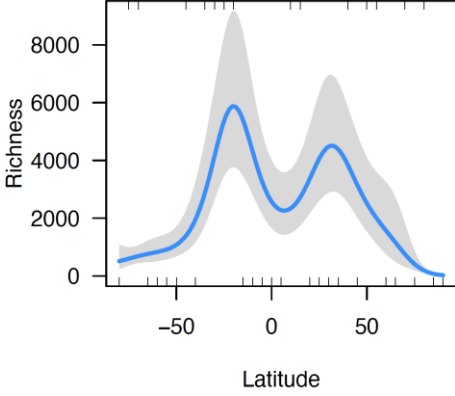 |  |
|------------------------|------------------|---------------------------------------------------------------------------------------------------------------------------------------------------------------------------------------------------------------------------------------------------------------------------------------------------------------------------------------------------------------------------------------------------------------------------------------------------------------------------------------------------------------------------------------------------------------------------------------------------------------------------------------------------------------------|-------------------------------------------------------------------------------------|-------------------------------------------------------------------------------------|

**Table S5.** Summary of the number of species and records in each phylum grouped as Benthic and Pelagic. The words in italics represent classes of Chordates. For detailed information, metadata are available at <https://figshare.com/s/befed3d16821d8bf1c11>.

| <b>Group</b>           | <b>Phylum</b>          | <b>Number of species</b> | <b>Number of records</b> |
|------------------------|------------------------|--------------------------|--------------------------|
| <b>Benthic species</b> | Annelida               | 3,811                    | 320,119                  |
|                        | Arthropoda             | 9,070                    | 556,465                  |
|                        | Brachiopoda            | 30                       | 1,330                    |
|                        | Bryozoa                | 676                      | 32,466                   |
|                        | Cephalorhyncha         | 43                       | 75                       |
|                        | Chaetognatha           | 6                        | 9                        |
|                        | Chordata               | 11,046                   | 2,830,730                |
|                        | <i>Actinopteri</i>     | 9,299                    | 2,502,226                |
|                        | <i>Asciacea</i>        | 864                      | 34,256                   |
|                        | <i>Coelacanthi</i>     | 1                        | 20                       |
|                        | <i>Elasmobranchii</i>  | 786                      | 268,787                  |
|                        | <i>Holocephali</i>     | 39                       | 22,672                   |
|                        | <i>Mammalia</i>        | 2                        | 2,001                    |
|                        | <i>Myxini</i>          | 38                       | 563                      |
|                        | <i>Petromyzonti</i>    | 4                        | 119                      |
|                        | <i>Reptilia</i>        | 13                       | 86                       |
|                        | Cnidaria               | 3,262                    | 116,104                  |
|                        | Ctenophora             | 6                        | 37                       |
|                        | Echinodermata          | 2,950                    | 132,509                  |
|                        | Entoprocta             | 13                       | 129                      |
|                        | Gastrotricha           | 36                       | 51                       |
|                        | Gnathostomulida        | 5                        | 5                        |
|                        | Hemichordata           | 28                       | 260                      |
|                        | Mollusca               | 9,810                    | 323,838                  |
|                        | Nematoda               | 889                      | 12,136                   |
|                        | Nemertea               | 63                       | 1,941                    |
|                        | Platyhelminthes        | 37                       | 655                      |
|                        | Porifera               | 1,393                    | 51,726                   |
|                        | Rotifera               | 9                        | 259                      |
|                        | Sipuncula              | 30                       | 5,907                    |
|                        | Tardigrada             | 22                       | 37                       |
|                        | Xenacoelomorpha        | 14                       | 14                       |
|                        | <b>Pelagic species</b> | Annelida                 | 107                      |
| Arthropoda             |                        | 2,163                    | 570,658                  |
| Chaetognatha           |                        | 56                       | 50,777                   |

| <b>Pelagic species</b> | <b>Chordata</b> | <b>2,392</b> | <b>1,777,118</b> |
|------------------------|-----------------|--------------|------------------|
|                        | Actinopteri     | 1,905        | 619,610          |
|                        | Appendicularia  | 21           | 8,395            |
|                        | Ascidiacea      | 1            | 1                |
|                        | Aves            | 317          | 872,822          |
|                        | Elasmobranchii  | 12           | 10,055           |
|                        | Leptocardii     | 7            | 1,064            |
|                        | Mammalia        | 77           | 243,098          |
|                        | Reptilia        | 6            | 19,635           |
|                        | Thaliacea       | 46           | 2,438            |
|                        | Cnidaria        | 194          | 25,753           |
|                        | Ctenophora      | 28           | 3,905            |
|                        | Mollusca        | 466          | 92,445           |
|                        | Rotifera        | 6            | 189              |

**Table S6.** The number of species, and observation records in All species, Pelagic species, and Benthic species) in the three time periods.

| <b>Group</b>             | <b>1955-1974</b> | <b>1975-1994</b> | <b>1995-2015</b> |
|--------------------------|------------------|------------------|------------------|
| <b>All Species</b>       |                  |                  |                  |
| <b>Number of species</b> | 23,817           | 29,738           | 26,943           |
| <b>Number of records</b> | 568,554          | 2,736,154        | 3,534,959        |
| <b>Pelagic species</b>   |                  |                  |                  |
| <b>Number of species</b> | 3,615            | 3,561            | 3,100            |
| <b>Number of records</b> | 233,711          | 947,201          | 1,319,885        |
| <b>Benthic species</b>   |                  |                  |                  |
| <b>Number of species</b> | 20,202           | 26,177           | 23,843           |
| <b>Number of records</b> | 334,843          | 1,788,953        | 2,215,074        |



**Table S7. Summary of models with Poisson and binomial error structures for Richness as the response and Latitude as the predictor for All species ( $Number\ of\ species \sim s(Latitude, k = 9); n = 35$ ).**

| Error structure                                 | R <sup>2</sup> (adj.) | Deviance explained (%) | AIC               | Residual plots                                                                                                                                                                                                                                                                                                                                                                                          |
|-------------------------------------------------|-----------------------|------------------------|-------------------|---------------------------------------------------------------------------------------------------------------------------------------------------------------------------------------------------------------------------------------------------------------------------------------------------------------------------------------------------------------------------------------------------------|
| Family: Poisson<br>Link function: log           | 0.89                  | 93.5                   | 7021.04 (edf = 8) | <p>The residual plots for the Poisson model show a clear non-linear pattern in the deviance residuals vs theoretical quantiles plot, indicating a poor fit. The residuals vs linear predictor plot shows a strong positive correlation. The histogram of residuals is skewed to the right. The response vs fitted values plot shows a strong positive correlation.</p>                                  |
| Family: Negative binomial<br>Link function: log | 0.86                  | 93.5                   | 618.44 (edf = 8)  | <p>The residual plots for the Negative binomial model show a much better fit. The deviance residuals vs theoretical quantiles plot shows a strong linear relationship. The residuals vs linear predictor plot shows a random distribution of points. The histogram of residuals is more symmetric and centered around zero. The response vs fitted values plot shows a strong positive correlation.</p> |

## References

1. Rex, M. A., Stuart, C. T., Hessler, R. R., Allen, J. A., Sanders, H. L., & Wilson, G. D. (1993). Global-scale latitudinal patterns of species diversity in the deep-sea benthos. *Nature*, 365(6447), 636.
2. Bolton, J. (1994). Global seaweed diversity: Patterns and anomalies. *Botanica Marina*, 37(3), 241-246.
3. Flessa, K. W., & Jablonski, D. (1995). Biogeography of recent marine bivalve molluscs and its implications for paleobiogeography and the geography of extinction: A progress report. *Historical Biology: An International Journal of Paleobiology*, 10(1), 25-47.
4. Roy, K., Jablonski, D., Valentine, J. W., & Rosenberg, G. (1998). Marine latitudinal diversity gradients: Tests of causal hypotheses. *Proceedings of the National Academy of Sciences*, 95(7), 3699-3702.
5. Rutherford, S., D'Hondt, S., & Prell, W. (1999). Environmental controls on the geographic distribution of zooplankton diversity. *Nature*, 400(6746), 749-753.
6. Roy, K., Jablonski, D., & Valentine, J. W. (2000). Dissecting latitudinal diversity gradients: Functional groups and clades of marine bivalves. *Proceedings of the Royal Society of London. Series B: Biological Sciences*, 267(1440), 293-299.
7. Crame, J. A. (2000). The nature and origin of taxonomic diversity gradients in marine bivalves. *Geological Society, London, Special Publications*, 177(1), 347-360.
8. Rex, M. A., Stuart, C. T., & Coyne, G. (2000). Latitudinal gradients of species richness in the deep-sea benthos of the North Atlantic. *Proceedings of the National Academy of Sciences*, 97(8), 4082-4085.
9. Culver, S. J., & Buzas, M. A. (2000). Global latitudinal species diversity gradient in deep-sea benthic foraminifera. *Deep Sea Research Part I: Oceanographic Research Papers*, 47(2), 259-275.
10. Willig, M. R. (2001). Latitude, common trends within. *Encyclopedia of Biodiversity* (3), 701-714.
11. Macpherson, E. (2002). Large-scale species-richness gradients in the Atlantic Ocean. *Proceedings of the Royal Society of London B: Biological Sciences*, 269(1501), 1715-1720.
12. Woodd-Walker, R. S., Ward, P., & Clarke, A. (2002). Large-scale patterns in diversity and community structure of surface water copepods from the Atlantic Ocean. *Marine Ecology Progress Series*, 236, 189-203.
13. Connolly, S. R., Bellwood, D. R., & Hughes, T. P. (2003). Indo-Pacific biodiversity of coral reefs: Deviations from a mid-domain model. *Ecology*, 84(8), 2178-2190.
14. Mora, C., Chittaro, P. M., Sale, P. F., Kritzer, J. P., & Ludsins, S. A. (2003). Patterns and processes in reef fish diversity. *Nature*, 421(6926), 933-936.
15. Valdovinos, C., Navarrete, S. A., & Marquet, P. A. (2003). Mollusk species diversity in the Southeastern Pacific: Why are there more species towards the pole? *Ecography*, 26(2), 139-144.
16. Gage, J. D., Lambshead, P. J. D., Bishop, J. D., Stuart, C. T., & Jones, N. S. (2004). Large-scale biodiversity pattern of Cumacea (Peracarida: Crustacea) in the deep Atlantic. *Marine Ecology Progress Series*, 277, 181-196.
17. Witman, J. D., Etter, R. J., & Smith, F. (2004). The relationship between regional and local species diversity in marine benthic communities: A global perspective. *Proceedings of the National Academy of Sciences*, 101(44), 15664-15669.
18. Gratwicke, B., & Speight, M. R. (2005). Effects of habitat complexity on Caribbean marine fish assemblages. *Marine Ecology Progress Series*, 292, 301-310.
19. Rex, M. A., Crame, J. A., Stuart, C. T., & Clarke, A. (2005). Large-scale biogeographic patterns in marine mollusks: A confluence of history and productivity? *Ecology*, 86(9), 2288-2297.
20. Worm, B., Sandow, M., Oschlies, A., Lotze, H. K., & Myers, R. A. (2005). Global patterns of predator diversity in the open oceans. *Science*, 309(5739), 1365-1369.
21. Brayard, A., Escarguel, G., & Bucher, H. (2005). Latitudinal gradient of taxonomic richness: Combined outcome of temperature and geographic mid-domains effects? *Journal of Zoological Systematics and Evolutionary Research*, 43(3), 178-188.
22. Dolan, J. R., Lemee, R., Gasparini, S., Mousseau, L., & Heyndrickx, C. (2006). Probing diversity in the plankton: Using patterns in Tintinnids (planktonic marine ciliates) to identify mechanisms. *Hydrobiologia*, 555(1), 143-157.
23. Kerswell, A. P. (2006). Global biodiversity patterns of benthic marine algae. *Ecology*, 87(10), 2479-2488.
24. Fuhrman, J. A., Steele, J. A., Hewson, I., Schwalbach, M. S., Brown, M. V., Green, J. L., & Brown, J. H. (2008). A latitudinal diversity gradient in planktonic marine bacteria. *Proceedings of the National Academy of Sciences*, 105(22), 7774-7778.
25. Rombouts, I., Beaugrand, G., Ibañez, F., Gasparini, S., Chiba, S., & Legendre, L. (2009). Global latitudinal variations in marine copepod diversity and environmental factors. *Proceedings of the Royal Society of London B: Biological Sciences*, 276, 3053-3062.

26. Tittensor, D. P., Mora, C., Jetz, W., Lotze, H. K., Ricard, D., Berghe, E. V., & Worm, B. (2010). Global patterns and predictors of marine biodiversity across taxa. *Nature*, *466*(7310), 1098-1101.
27. Kaschner, K., Tittensor, D. P., Ready, J., Gerrodette, T., & Worm, B. (2011). Current and future patterns of global marine mammal biodiversity. *PLOS ONE*, *6*(5), e19653.
28. Beaugrand, G., Rombouts, I., & Kirby, R. R. (2013). Towards an understanding of the pattern of biodiversity in the oceans. *Global Ecology and Biogeography*, *22*(4), 440-449.
29. Saeedi, H., Dennis, T. E., & Costello, M. J. (2017a). Bimodal latitudinal species richness and high endemism of razor clams (Mollusca). *Journal of Biogeography*, *44*(3), 592-604.
